# Supplementary material for: Imino phenoxide complexes of group 4 metals: synthesis, structural characterization and polymerization studies
Source: Royal Society of Chemistry journal article supplement (doi:10.1039/c3nj40916c), 2013-01-01
Supplement: c3nj40916c.pdf [file c3nj40916c.pdf]

# Supporting Information

## **Imino Phenoxide Complexes of Group 4 metals: Synthesis, Structural Characterization and Polymerization Studies**

**Tanmoy Kumar Saha, Mrinmay Mandal, Debashis Chakraborty\*, Venkatachalam Ramkumar**

*Department of Chemistry, Indian Institute of Technology Madras, Chennai-600 036, Tamil Nadu, India. E-mail: [dchakraborty@iitm.ac.in](mailto:dchakraborty@iitm.ac.in)*

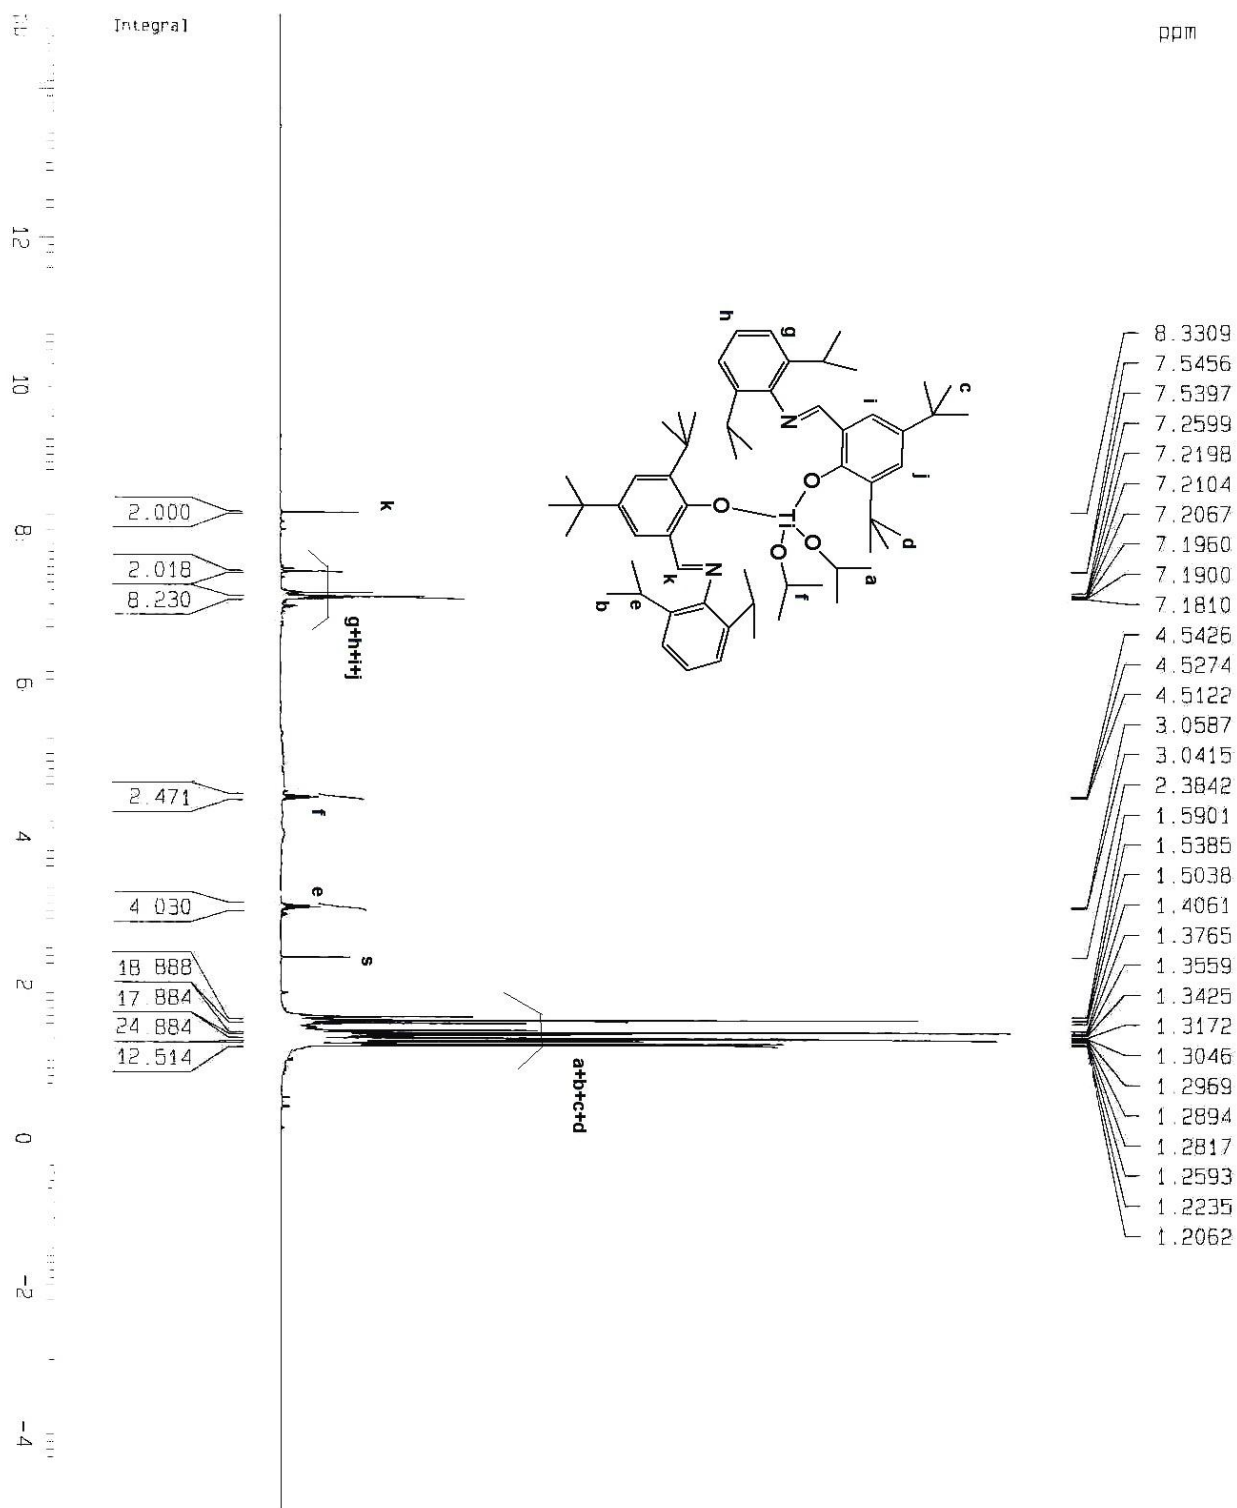

Fig. S1.  $^1\text{H}$  NMR (400 MHz,  $\text{CDCl}_3$ ) of Compound 1



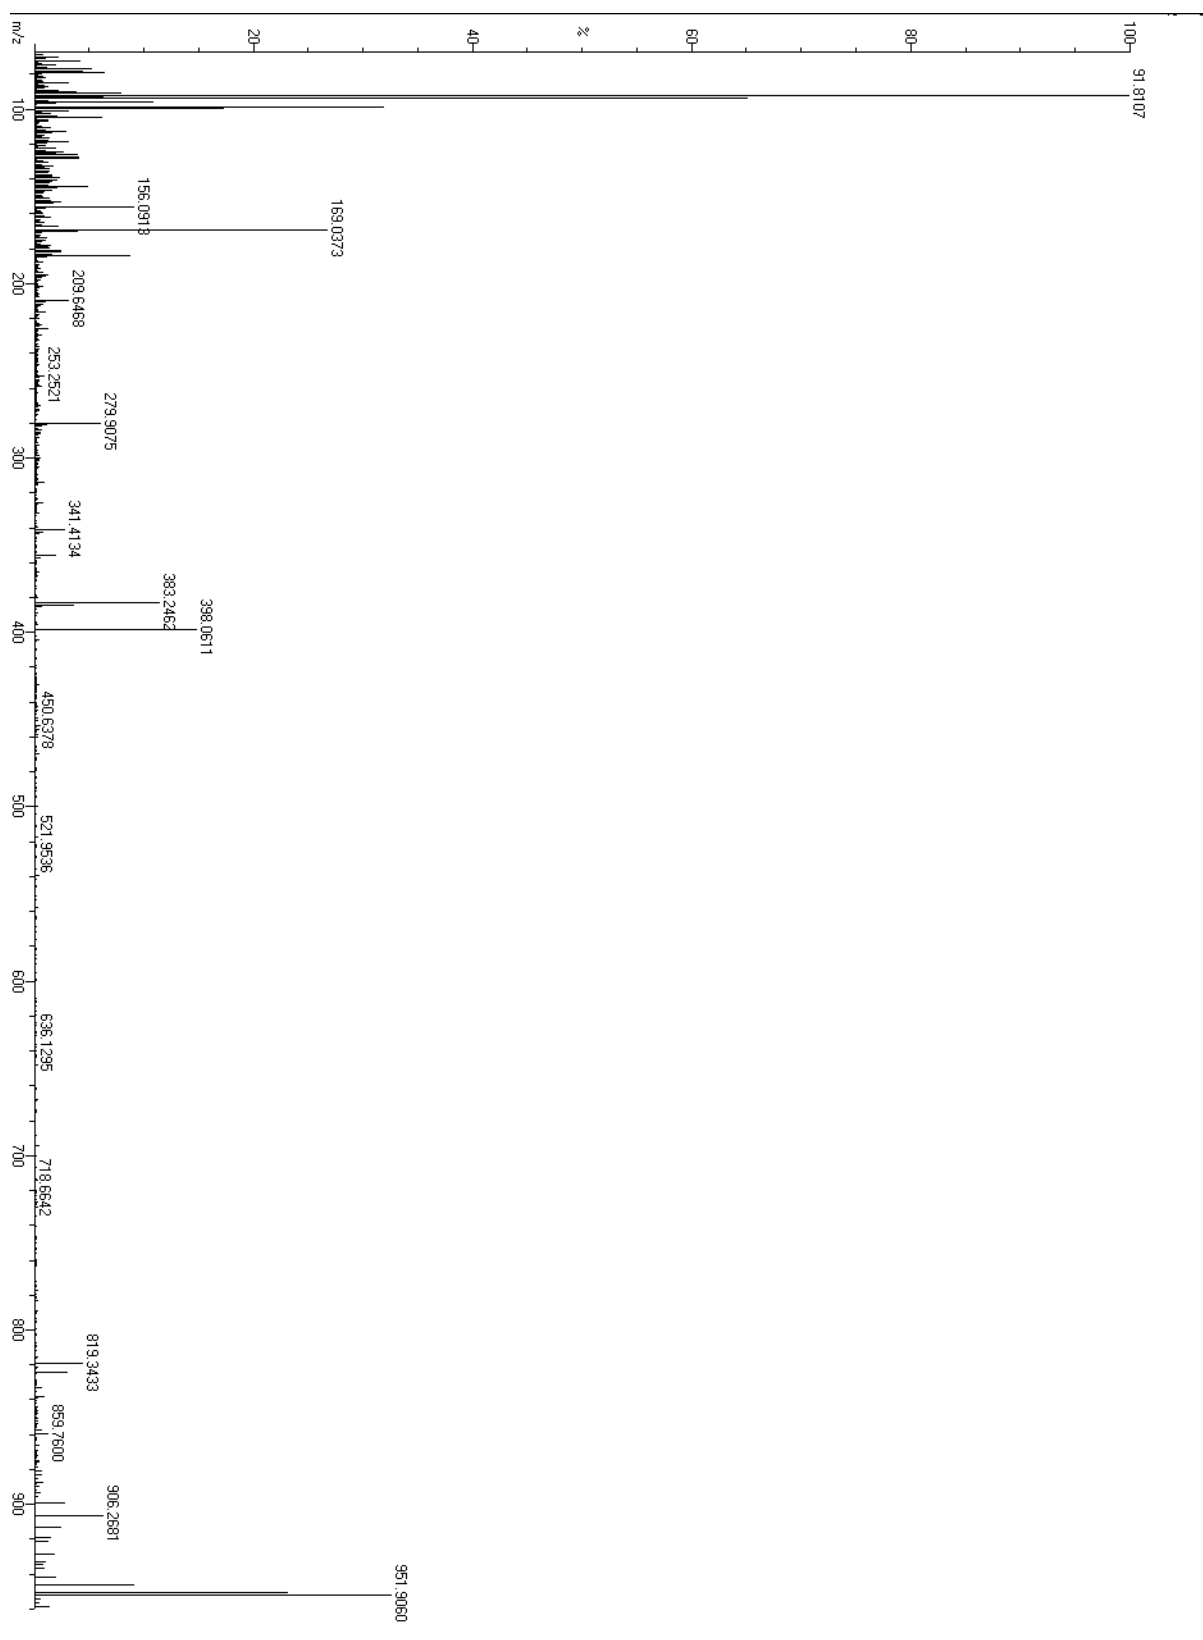

**Fig. S3.** ESI-Mass Spectrum of Compound 1

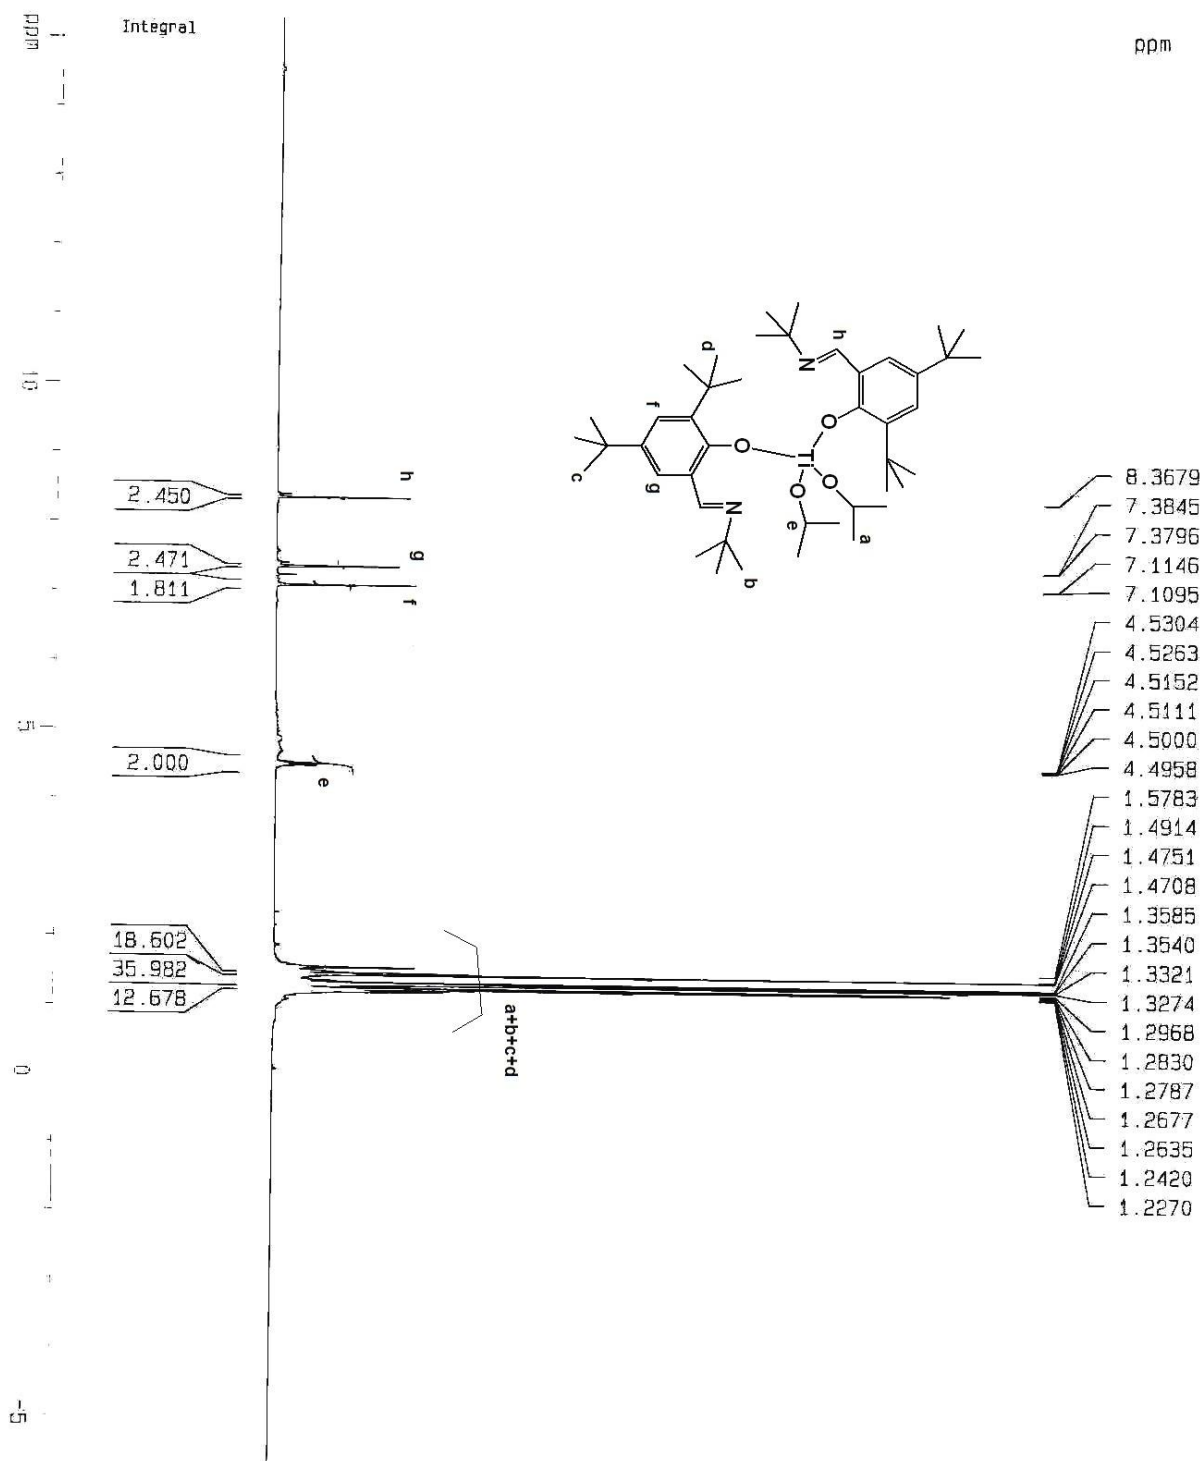

Fig. S4.  $^1\text{H}$  NMR (400 MHz,  $\text{CDCl}_3$ ) of Compound 2

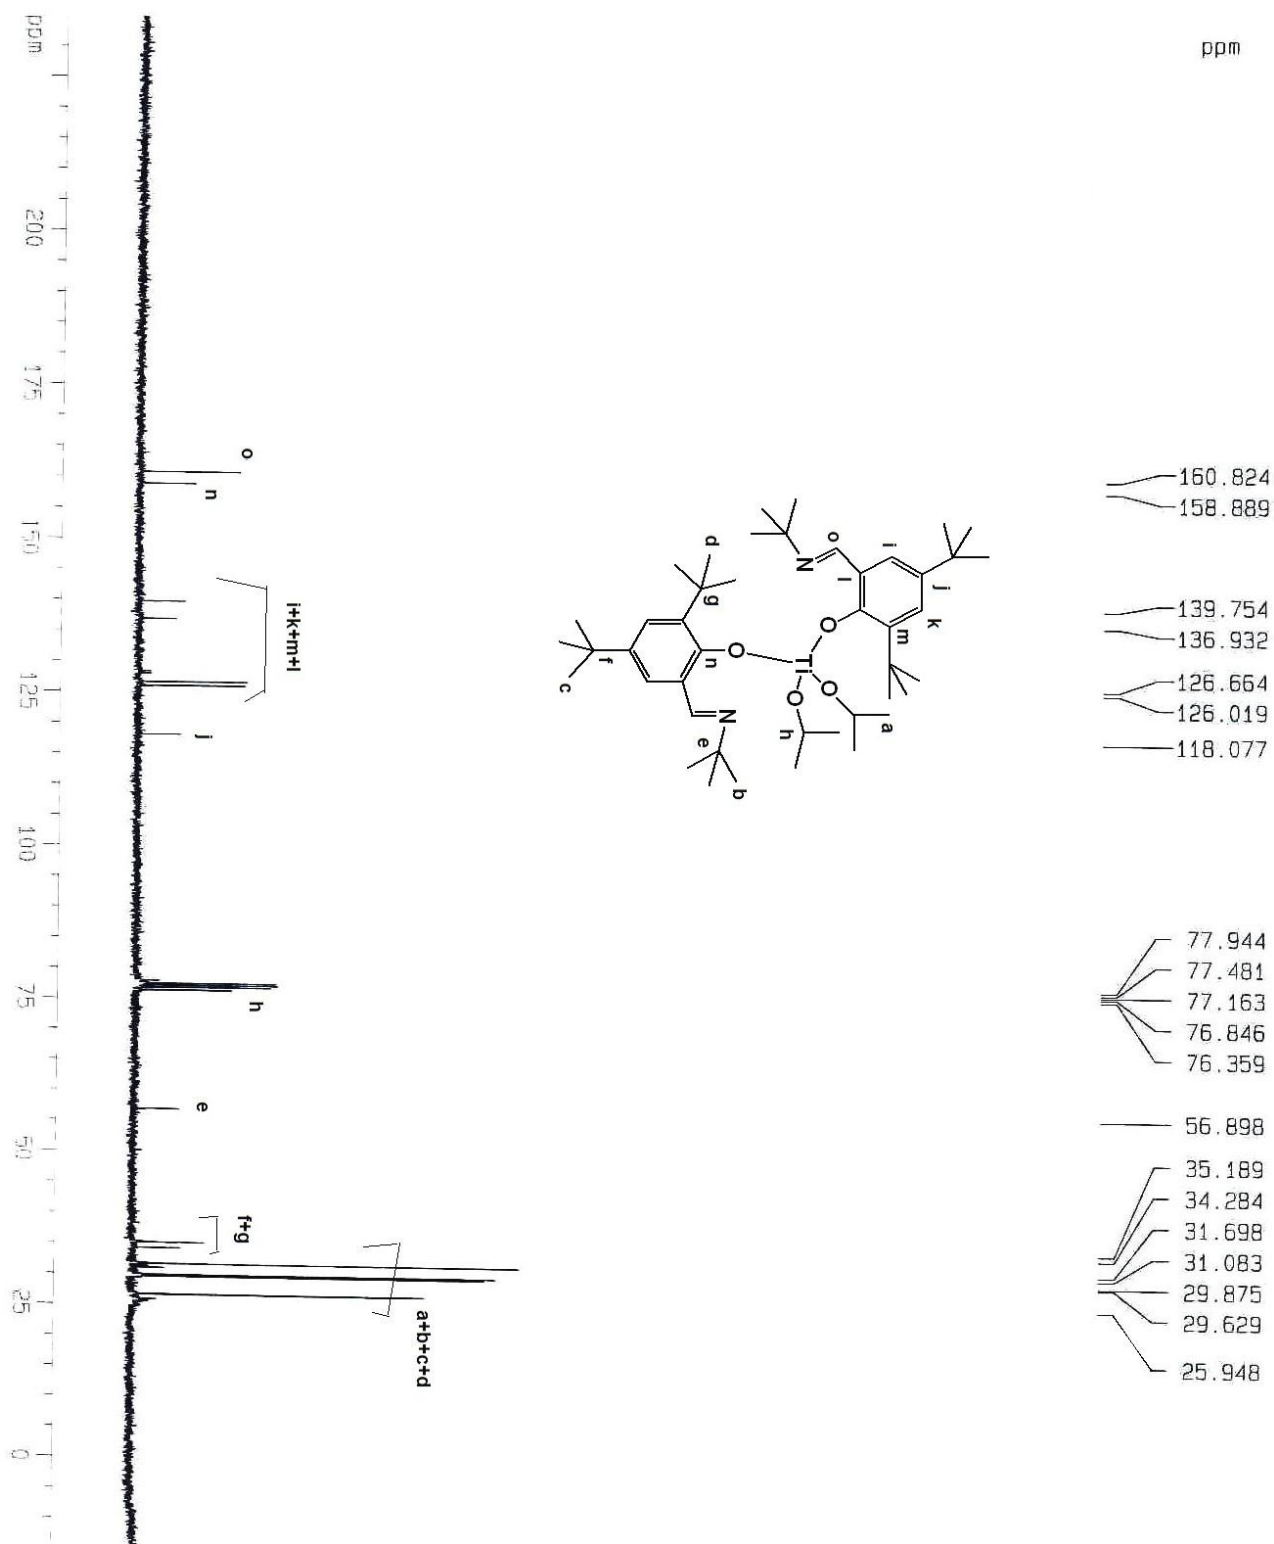

Fig. S5.  $^{13}\text{C}$  NMR (100 MHz,  $\text{CDCl}_3$ ) of Compound 2

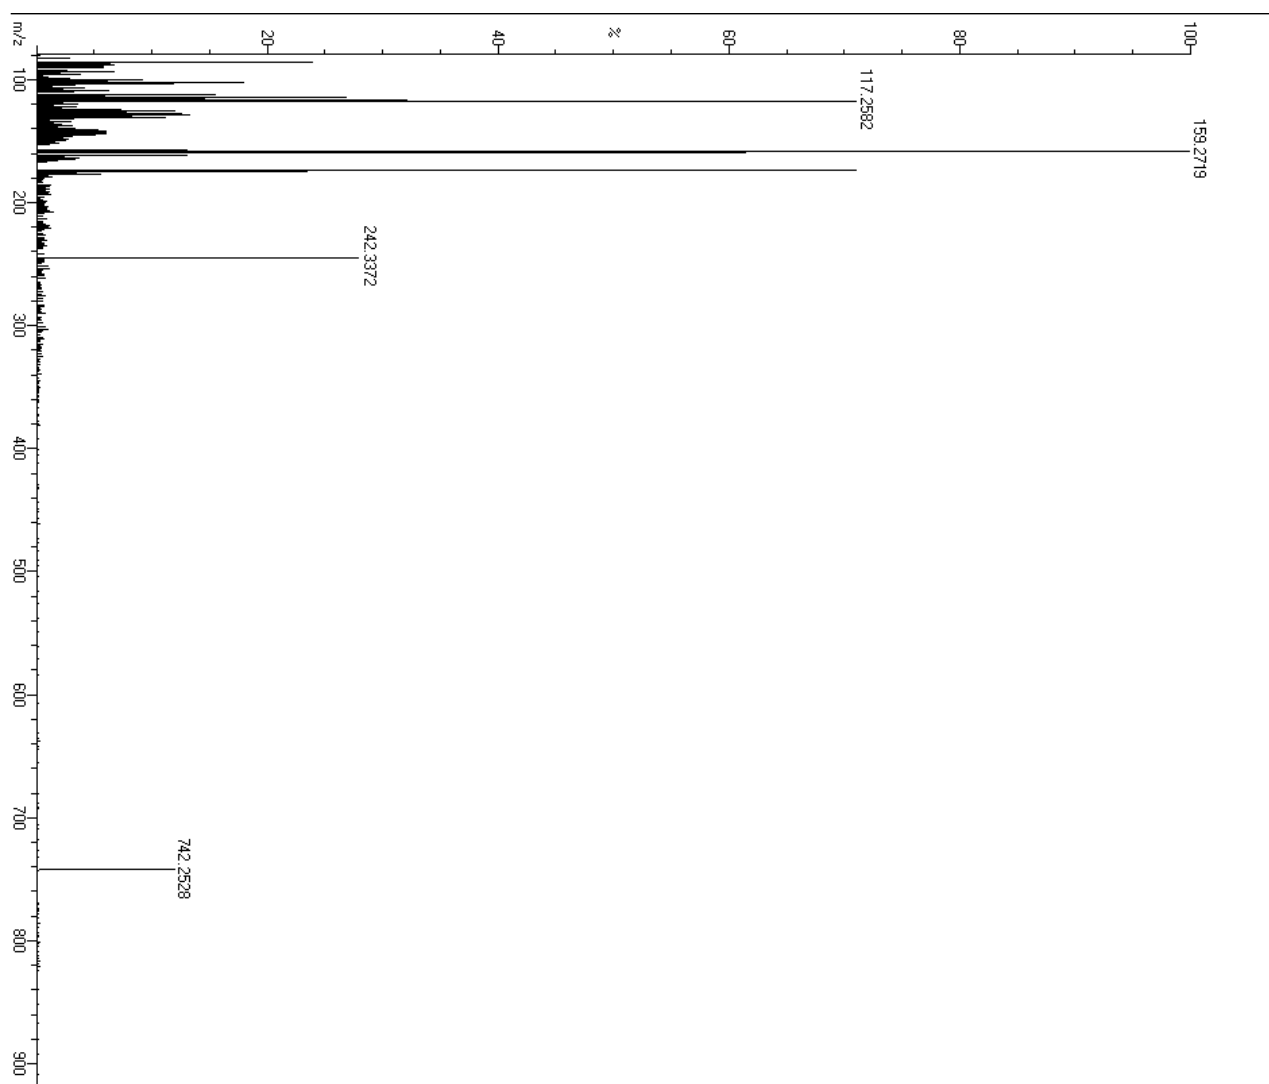

**Fig. S6.** ESI-Mass spectrum of Compound 2

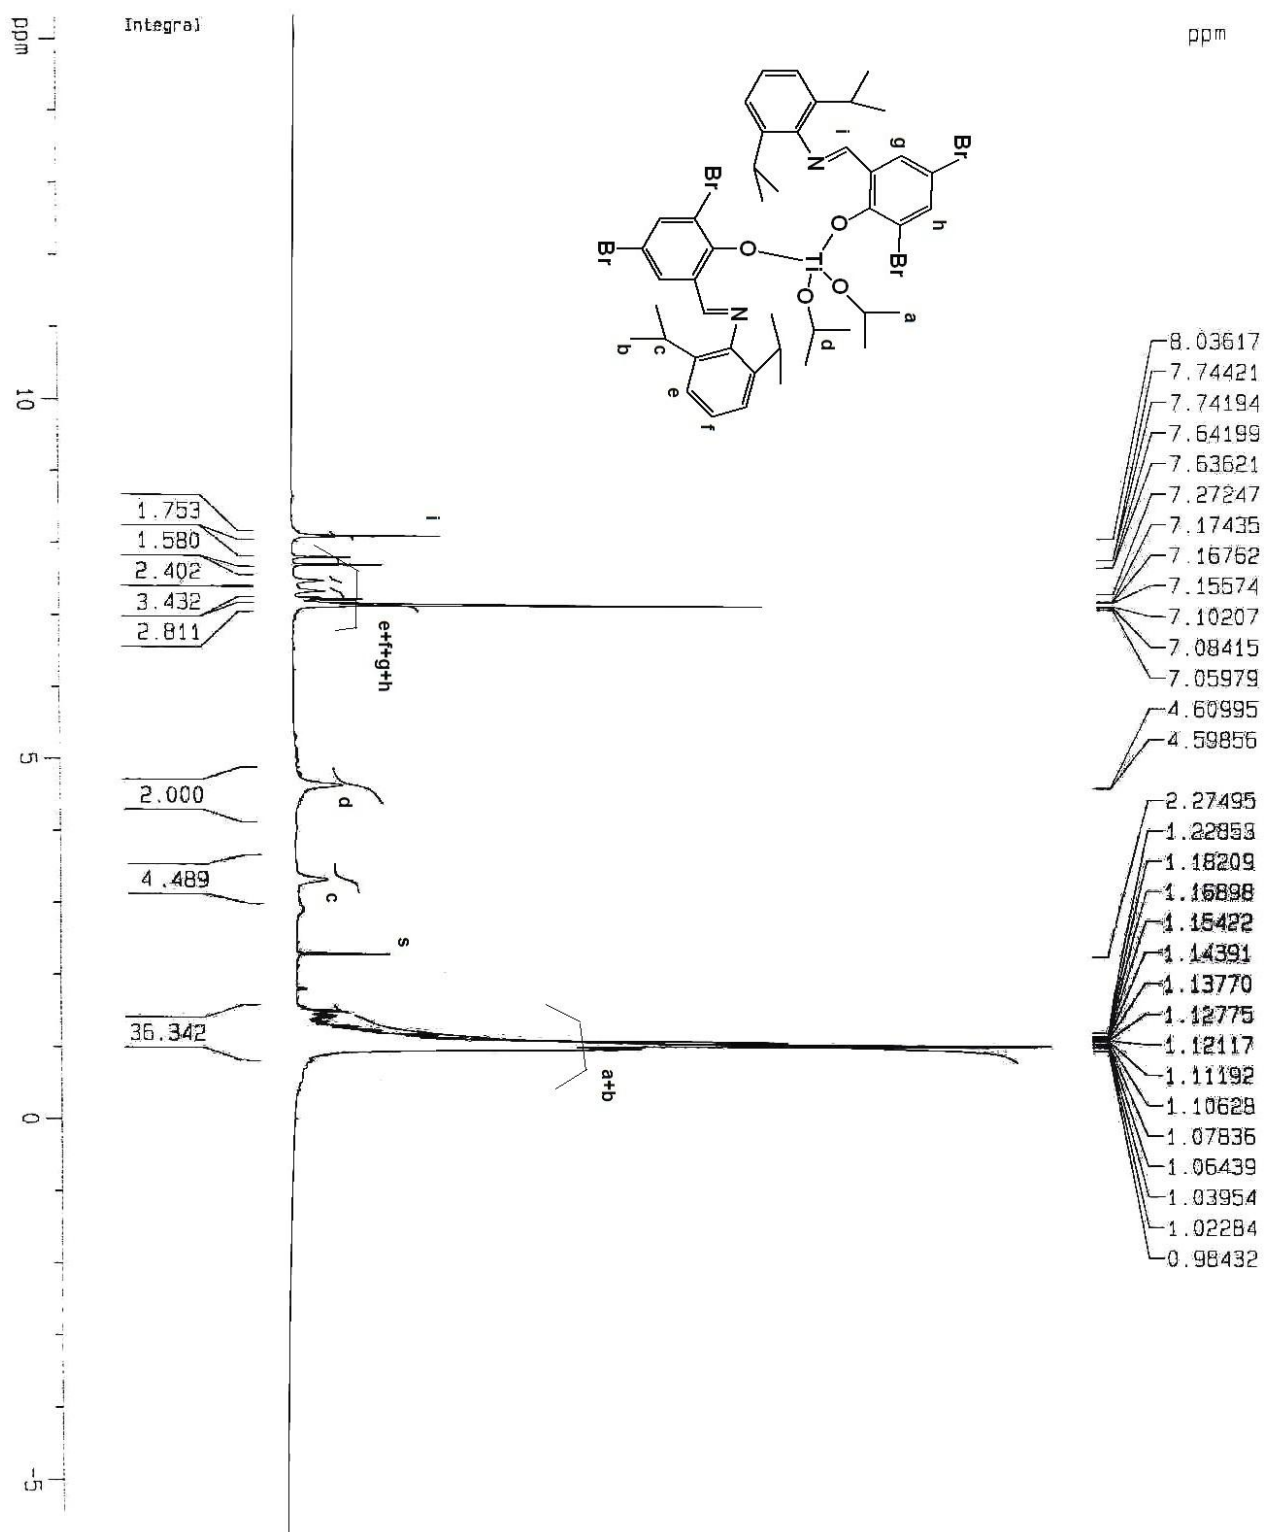

Fig. S7.  $^1\text{H}$  NMR (400 MHz,  $\text{CDCl}_3$ ) of Compound 3



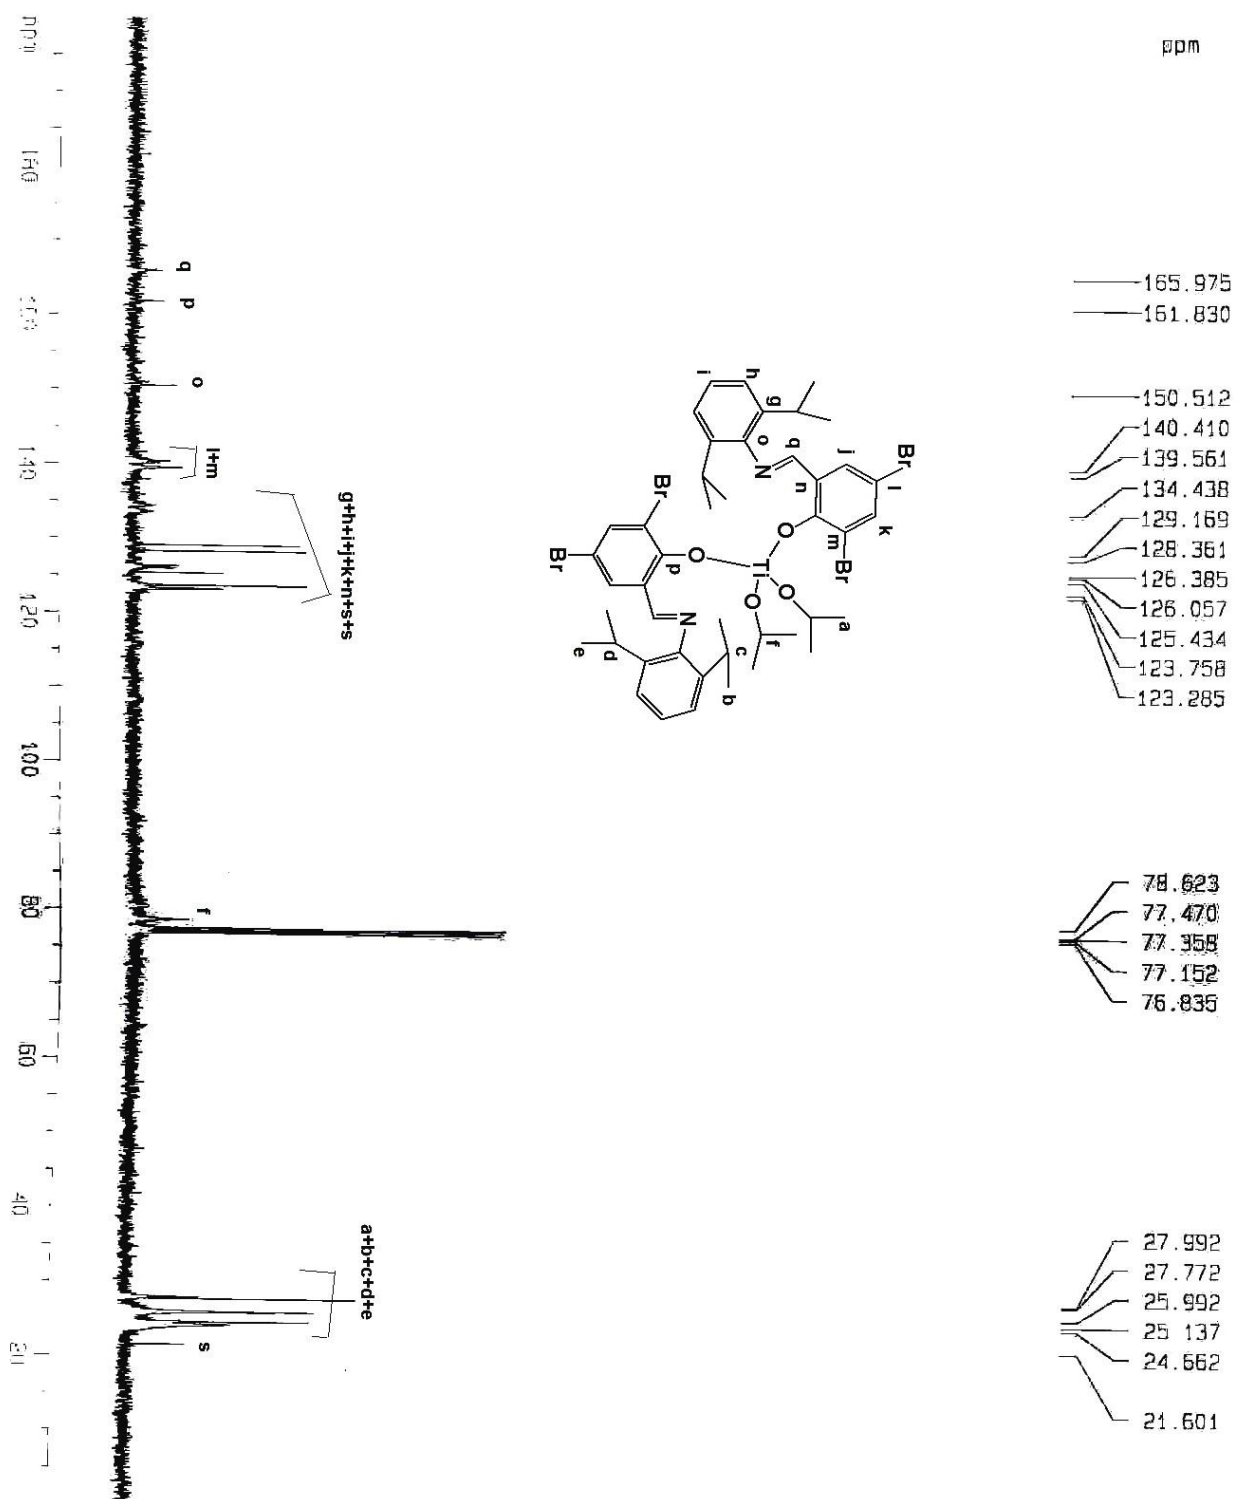

Fig. S8.  $^{13}\text{C}$  NMR (100 MHz,  $\text{CDCl}_3$ ) of Compound 3

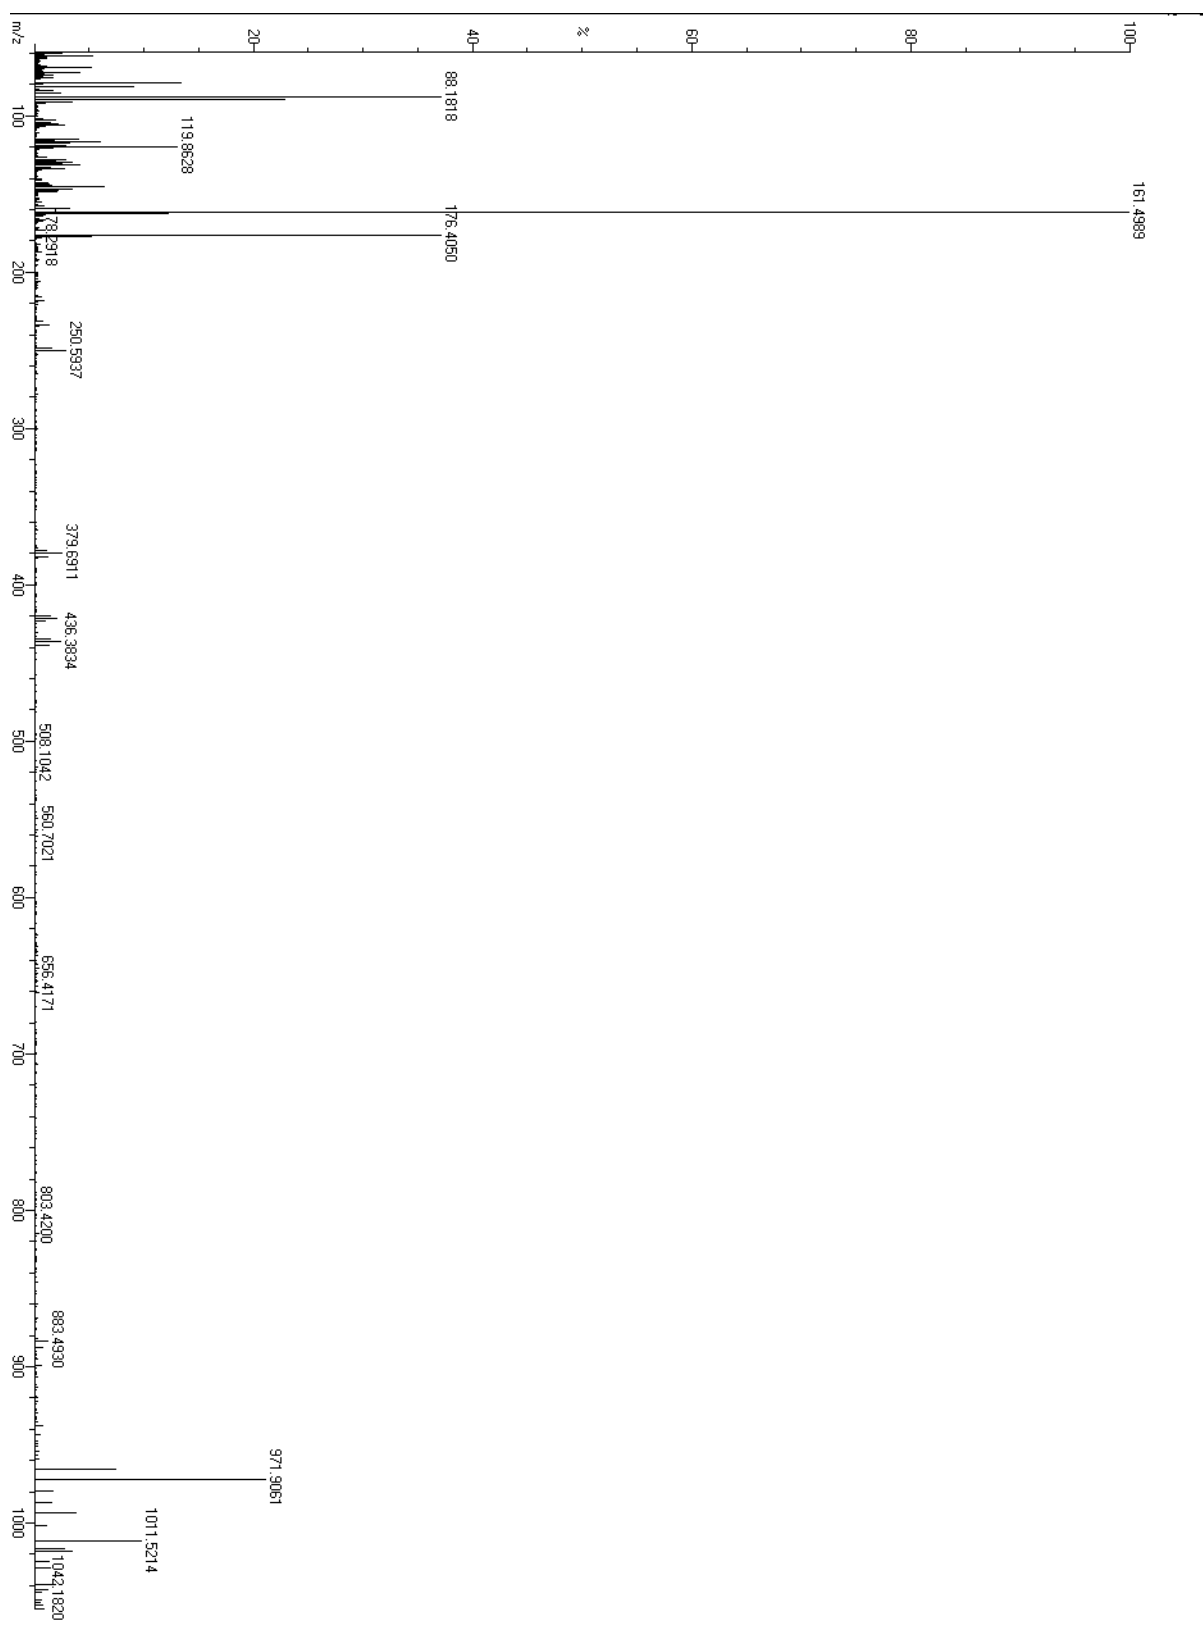

**Fig. S9.** ESI-Mass Spectrum of Compound 3

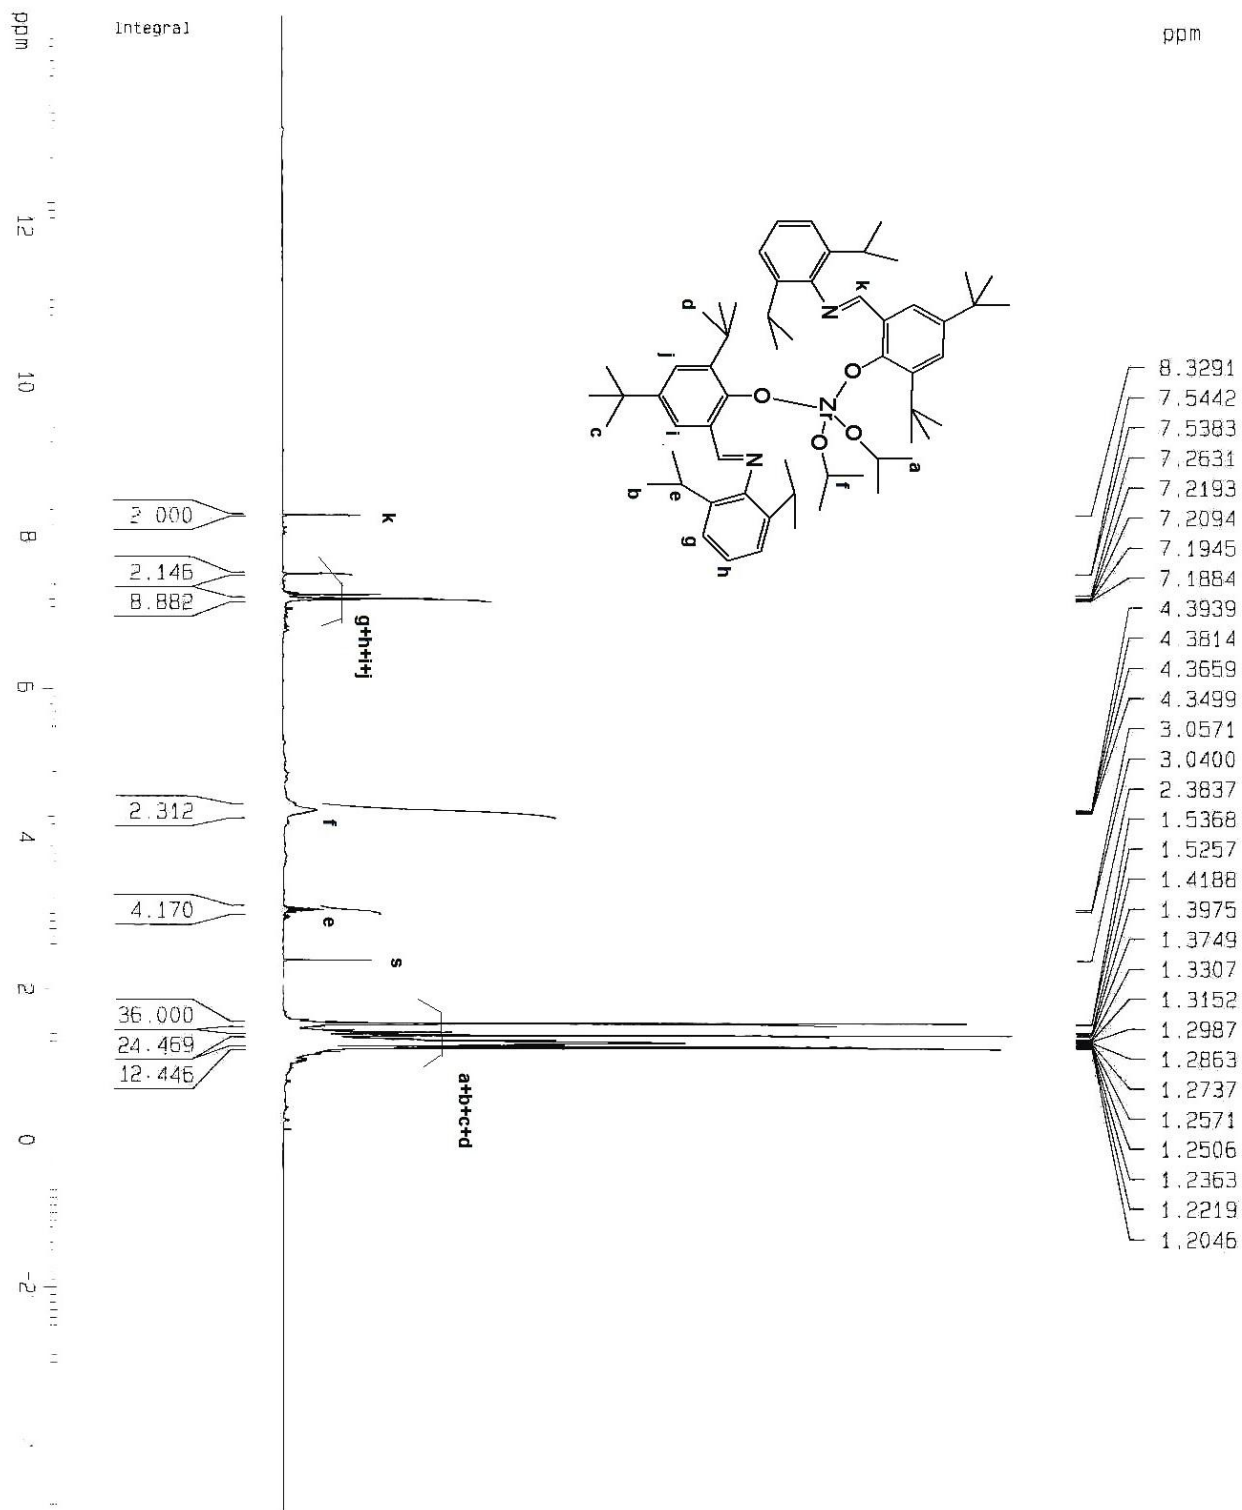

**Fig. S10.**  $^1\text{H}$  NMR (400 MHz,  $\text{CDCl}_3$ ) of Compound 4

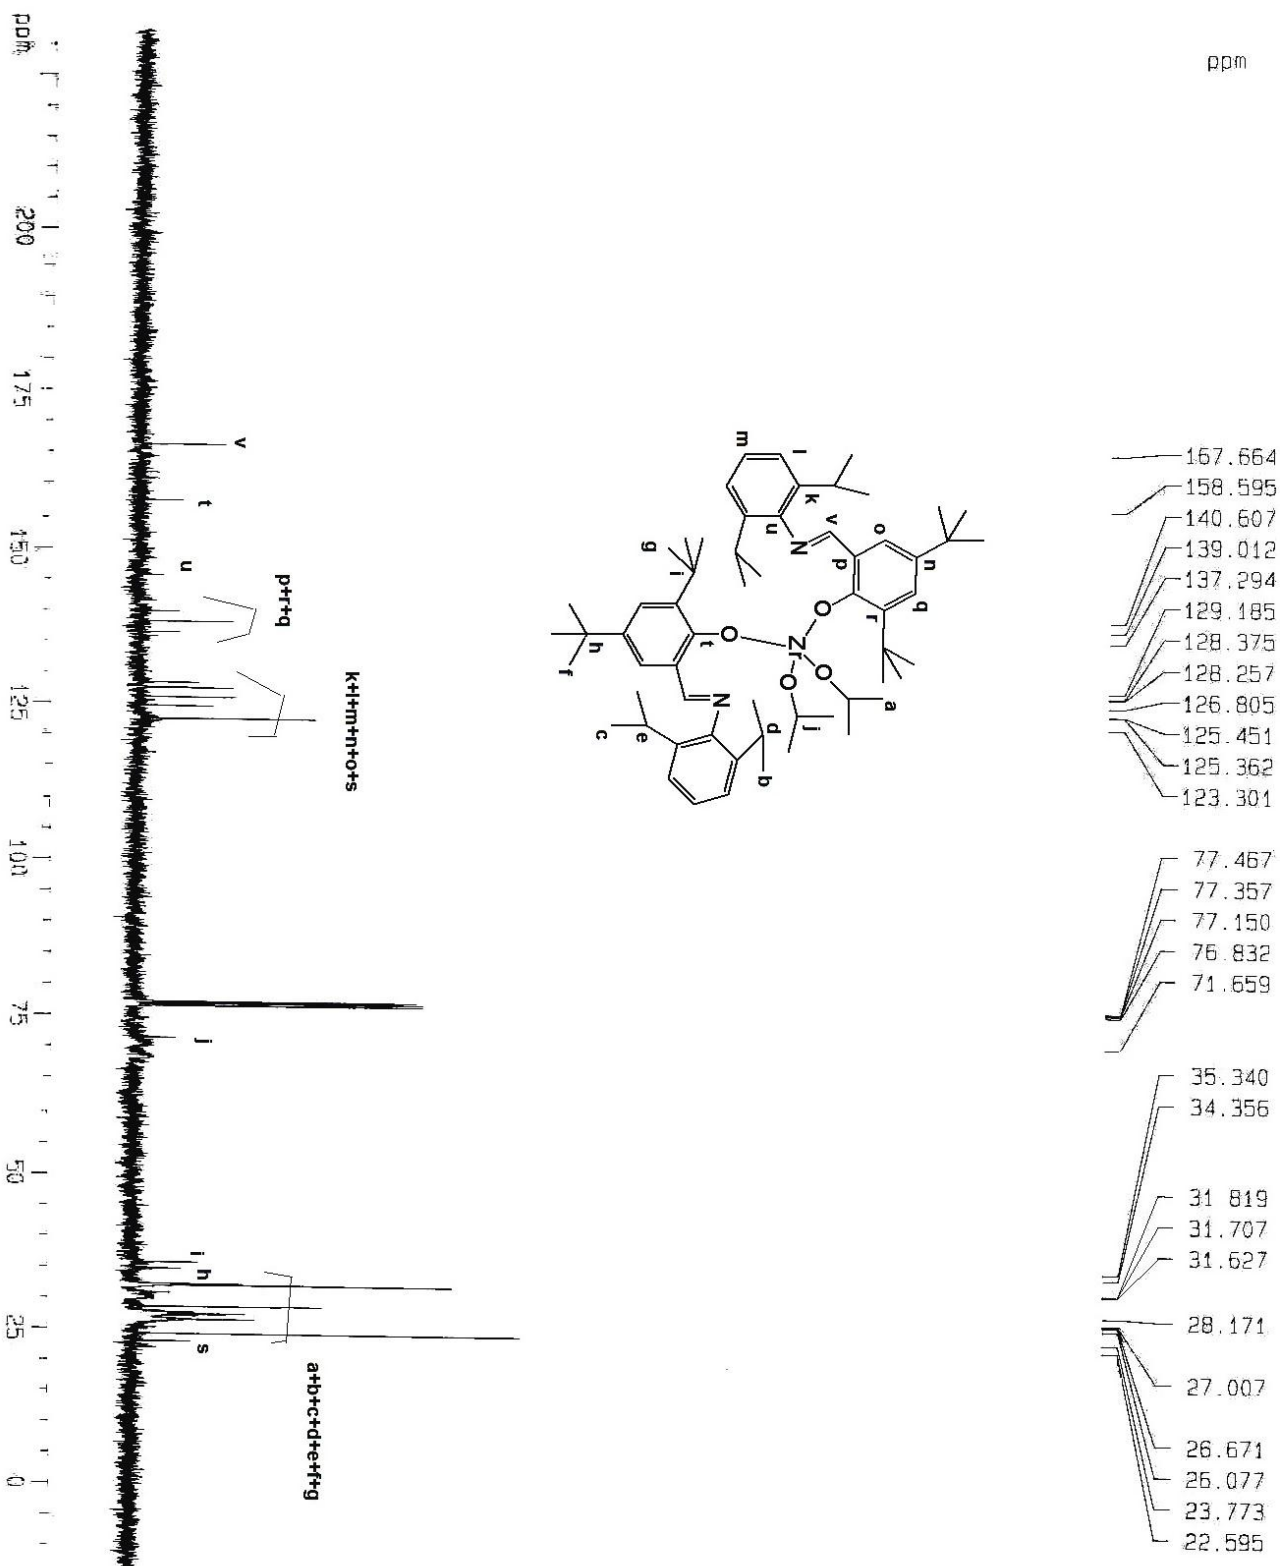

Fig. S11.  $^{13}\text{C}$  NMR (100 MHz,  $\text{CDCl}_3$ ) of Compound 4

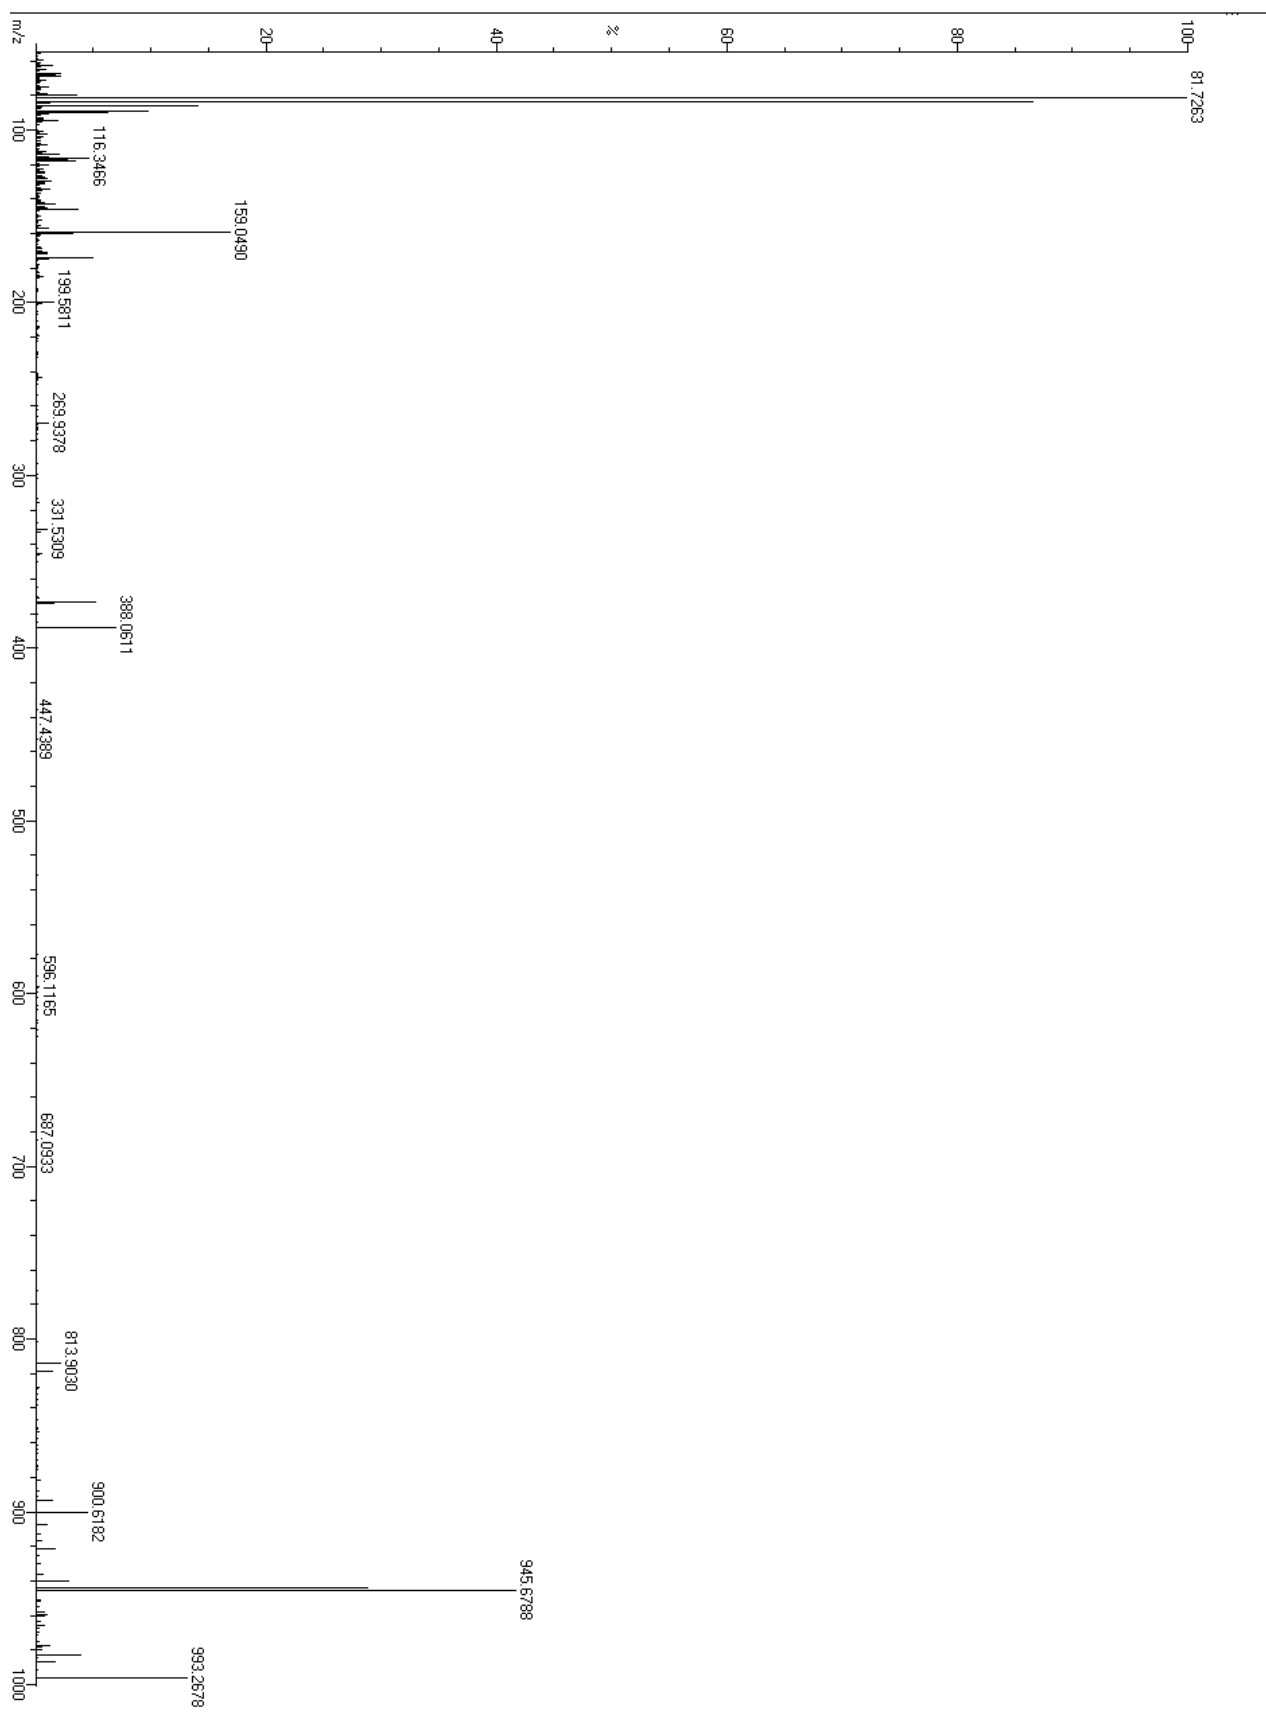

**Fig. S12.** ESI-Mass Spectrum of Compound 4

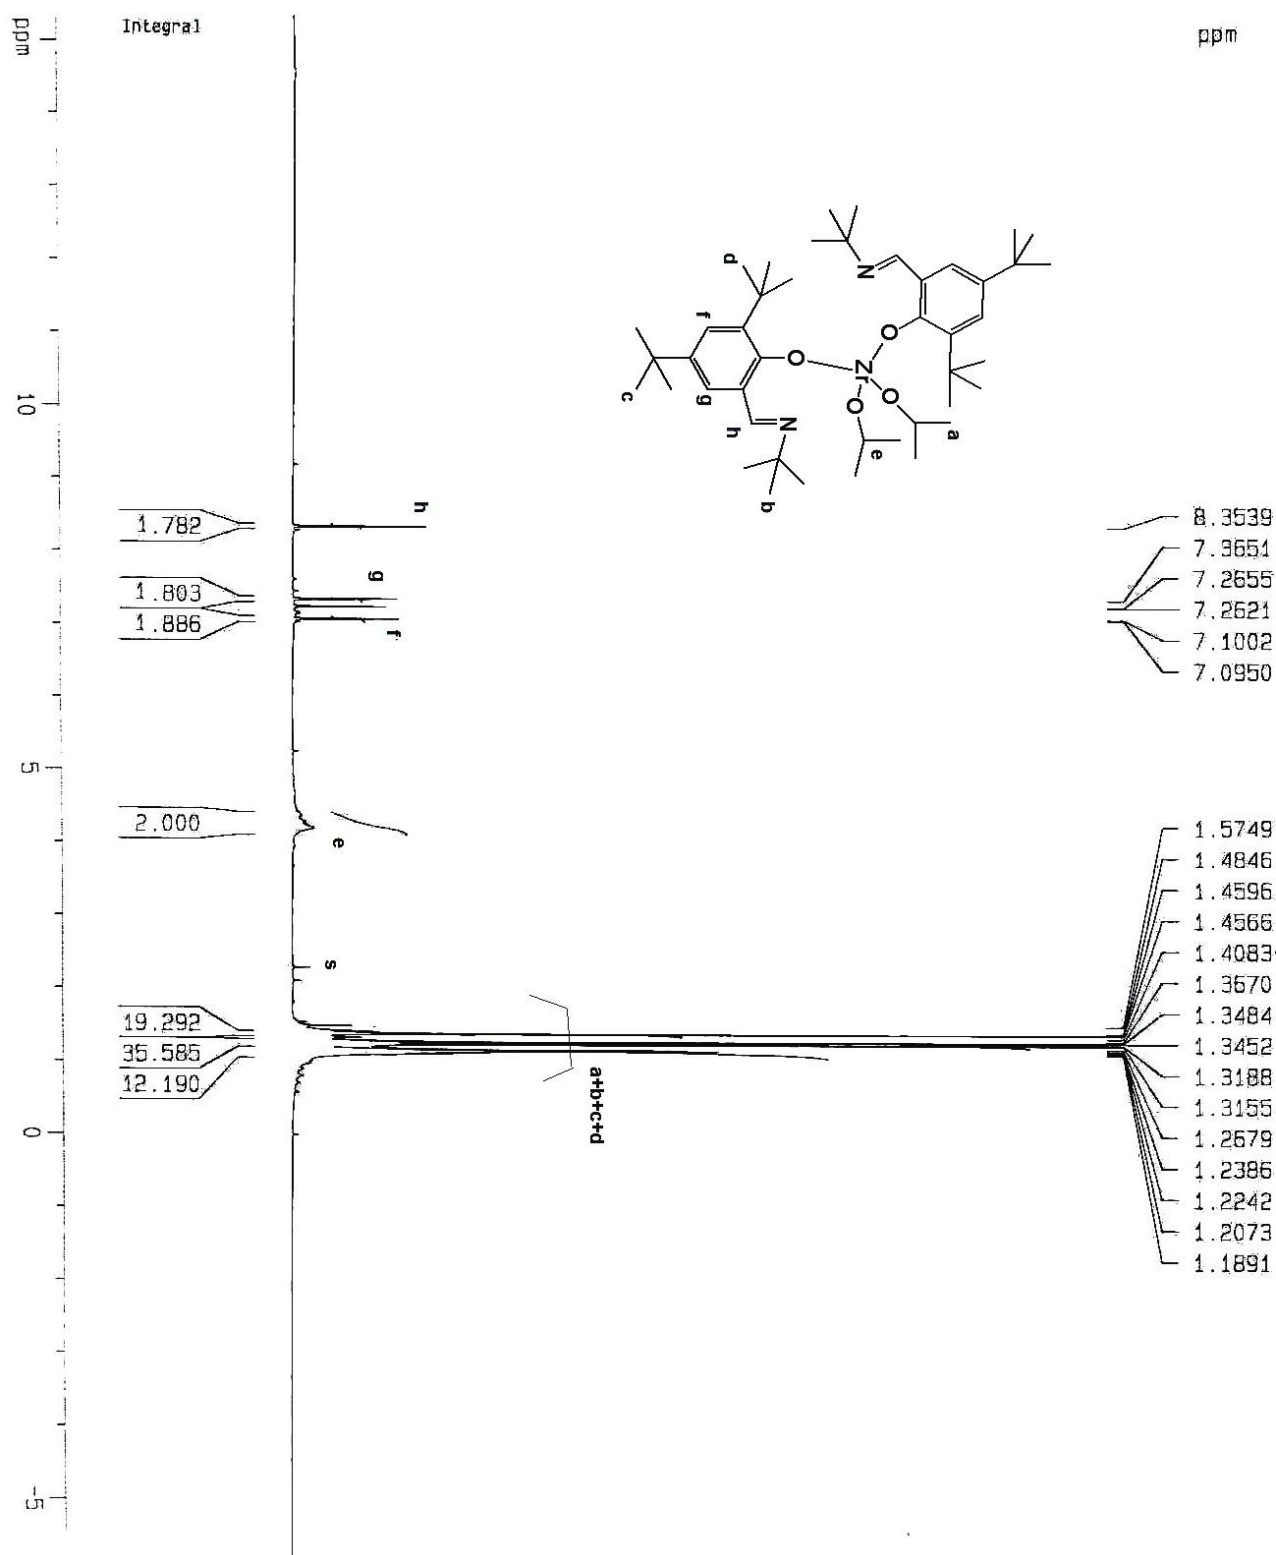

Fig. S13.  $^1\text{H}$  NMR (400 MHz,  $\text{CDCl}_3$ ) of Compound 5

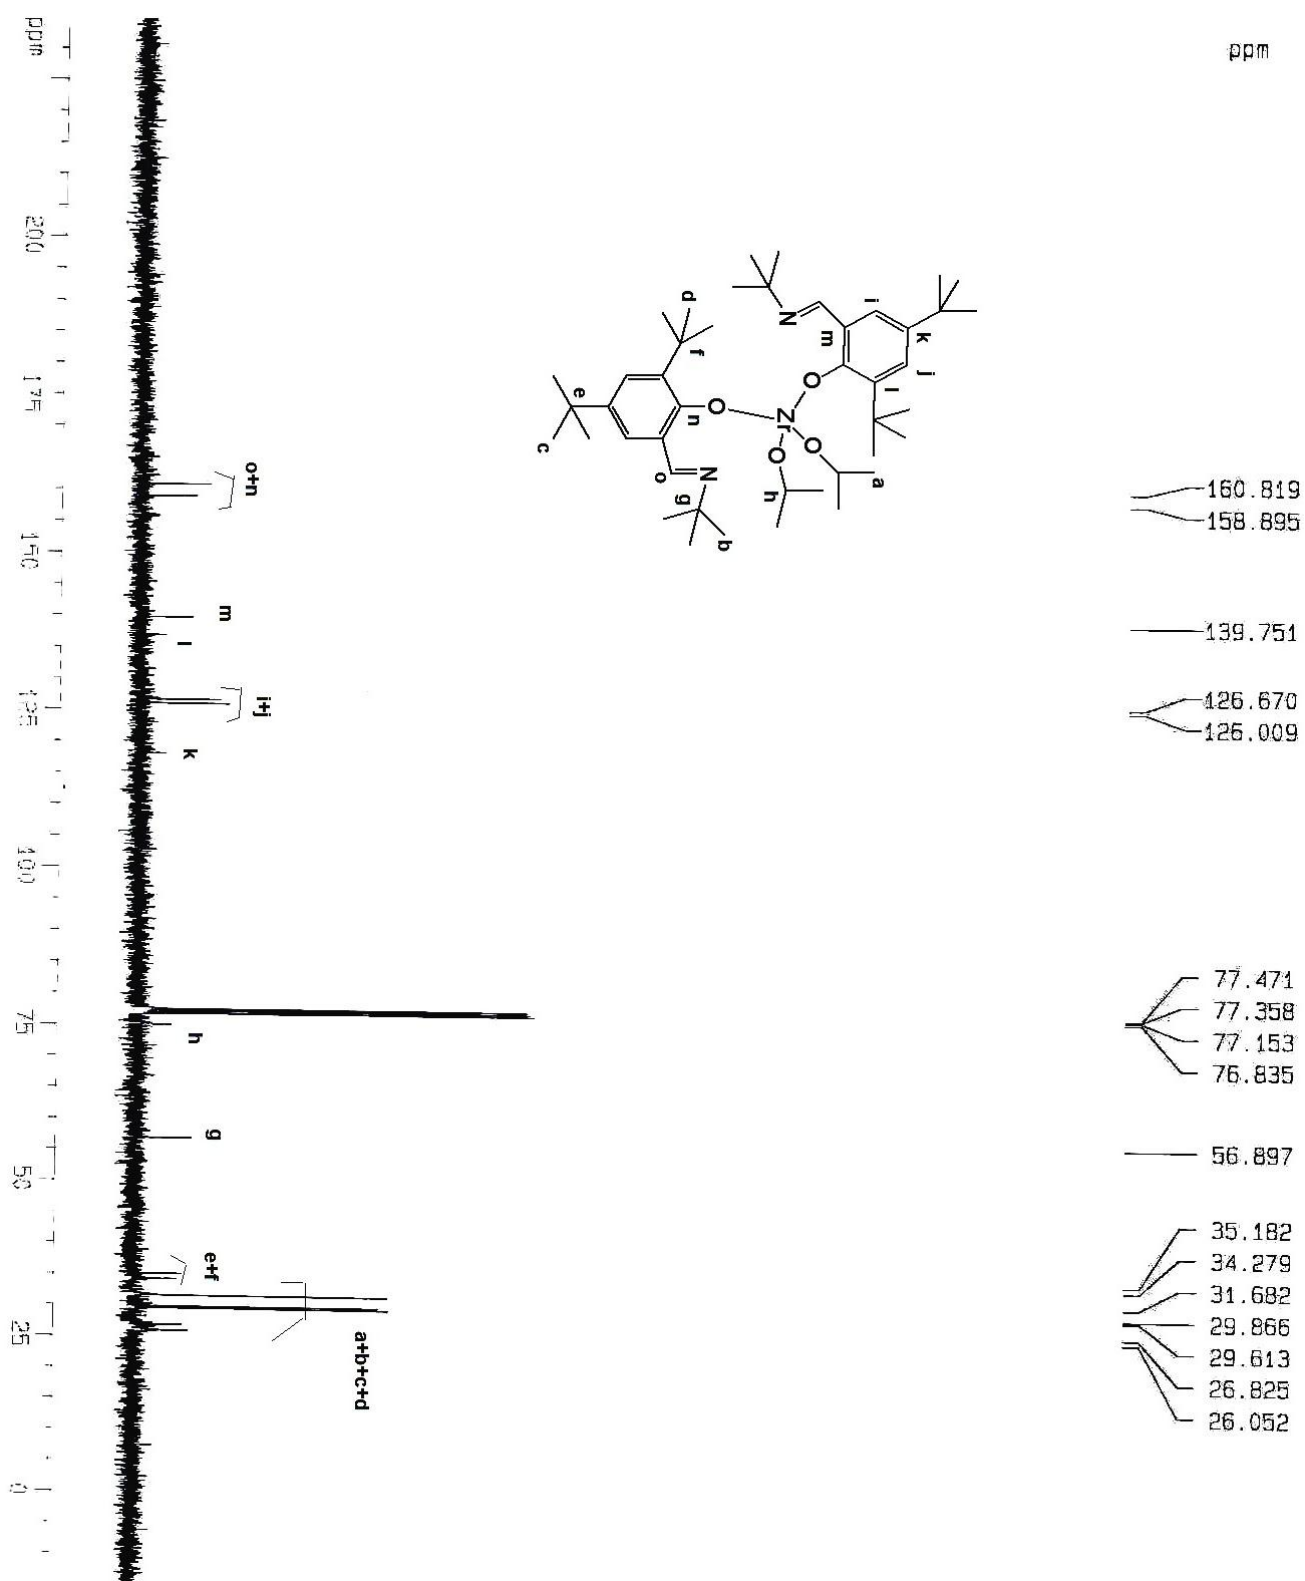

Fig. S14. <sup>13</sup>C NMR (100 MHz, CDCl<sub>3</sub>) of Compound 5

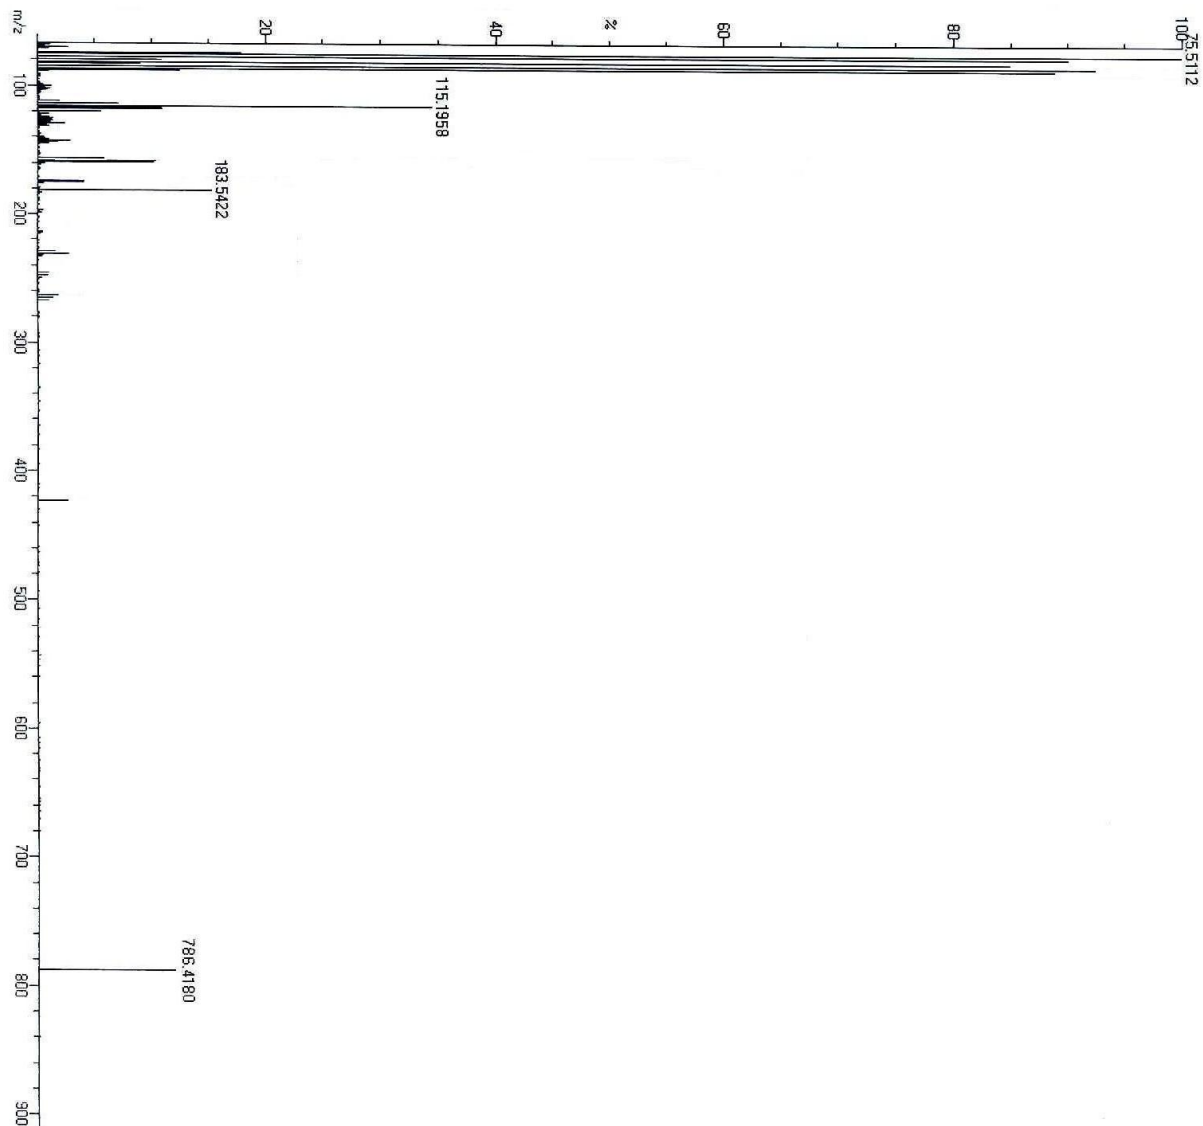

**Fig. S15.** ESI-Mass Spectrum of Compound **5**



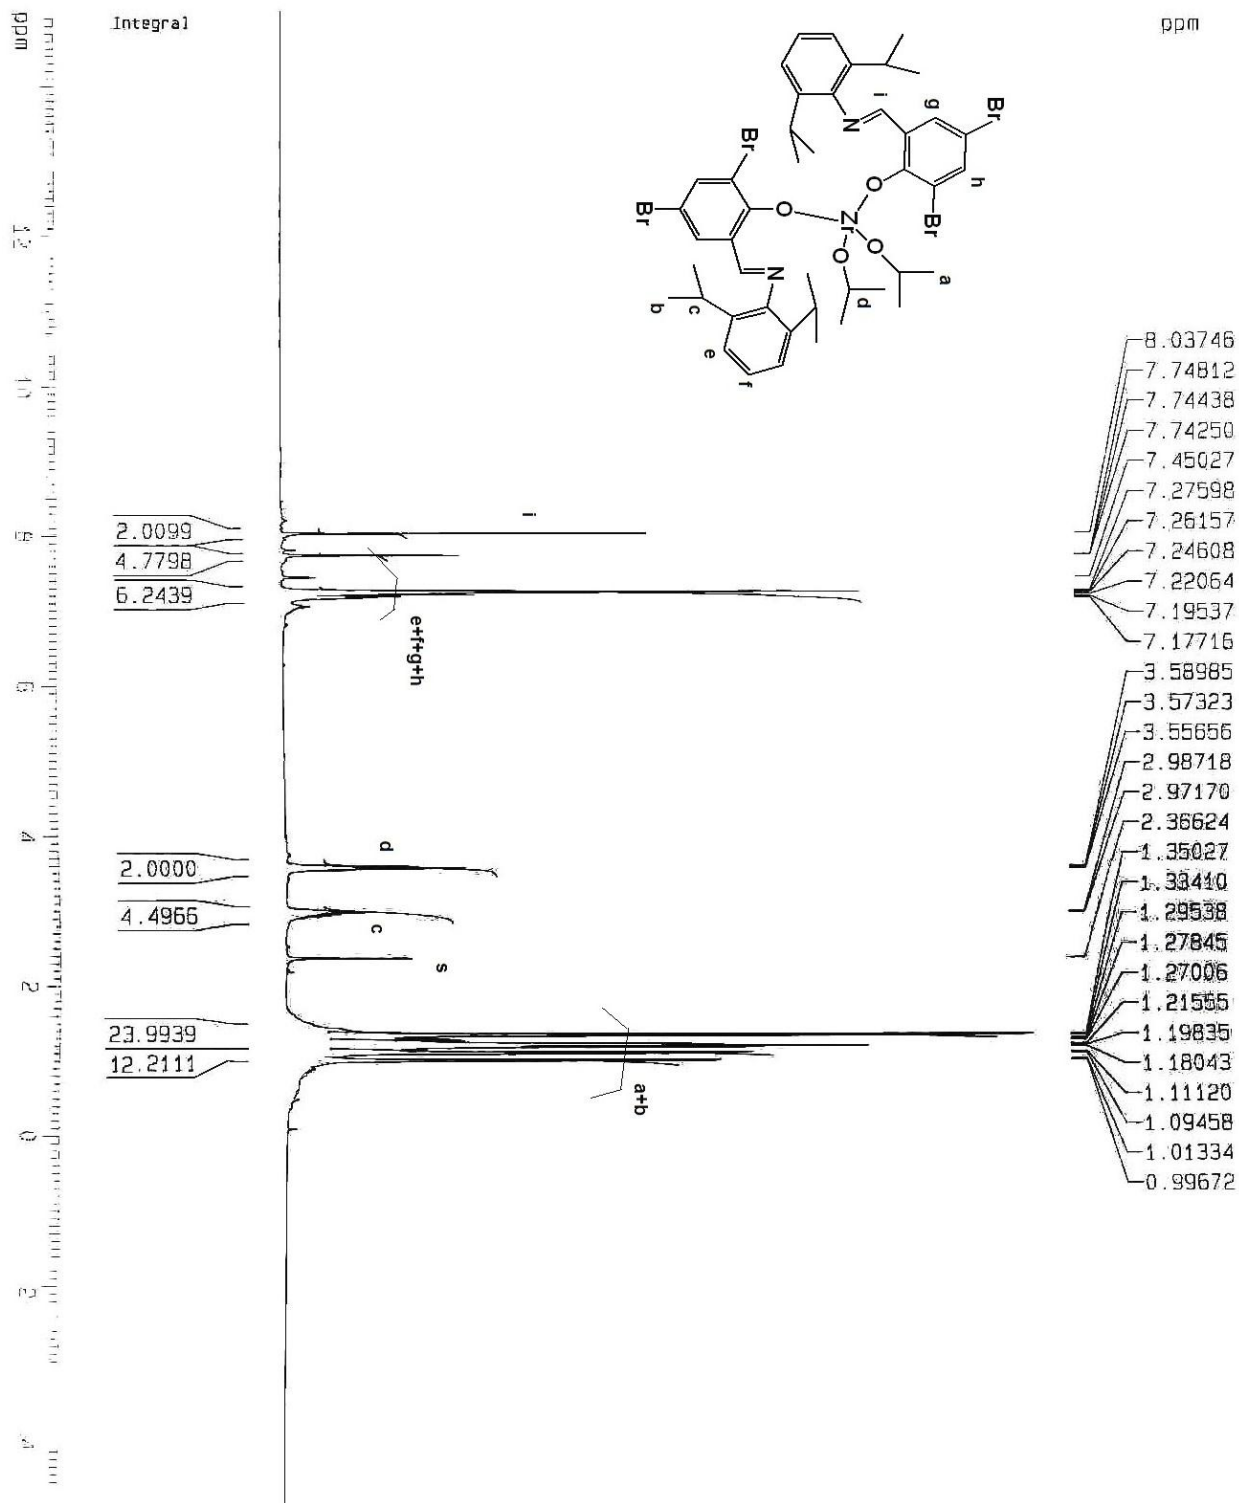

Fig. S16.  $^1\text{H}$  NMR (400 MHz,  $\text{CDCl}_3$ ) of Compound 6

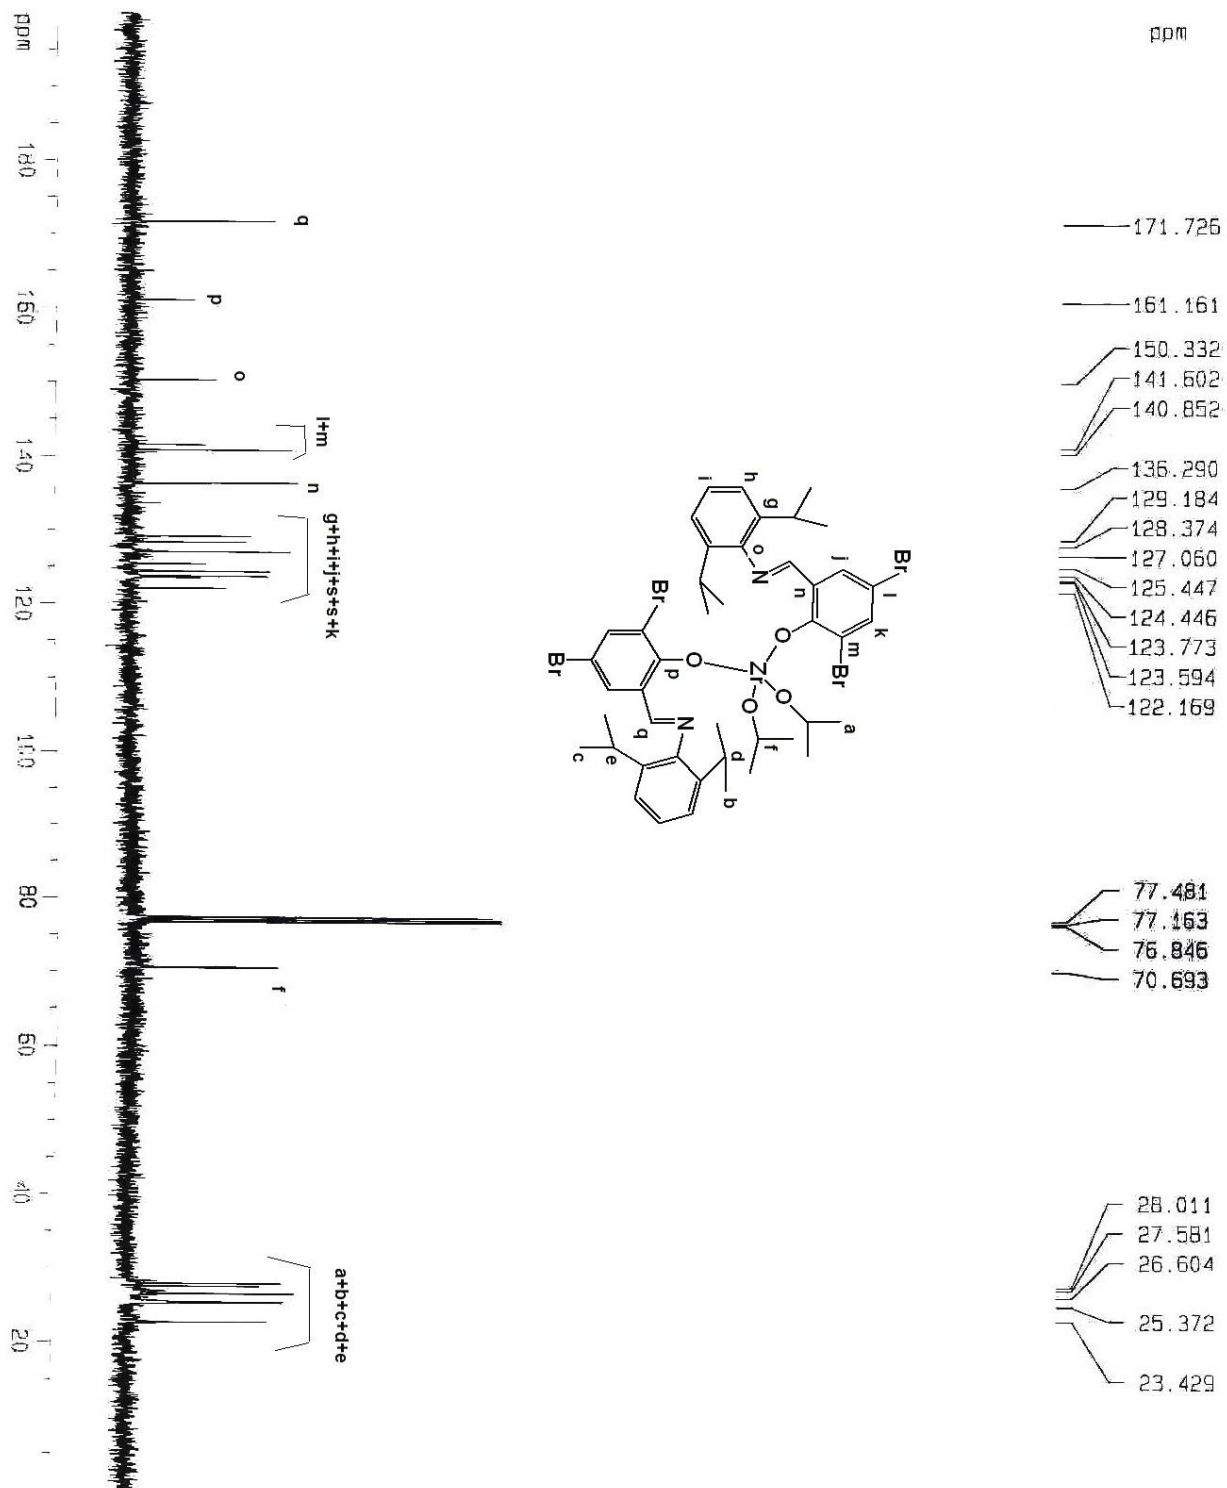

Fig. S17.  $^{13}\text{C}$  NMR (100 MHz,  $\text{CDCl}_3$ ) of Compound 6

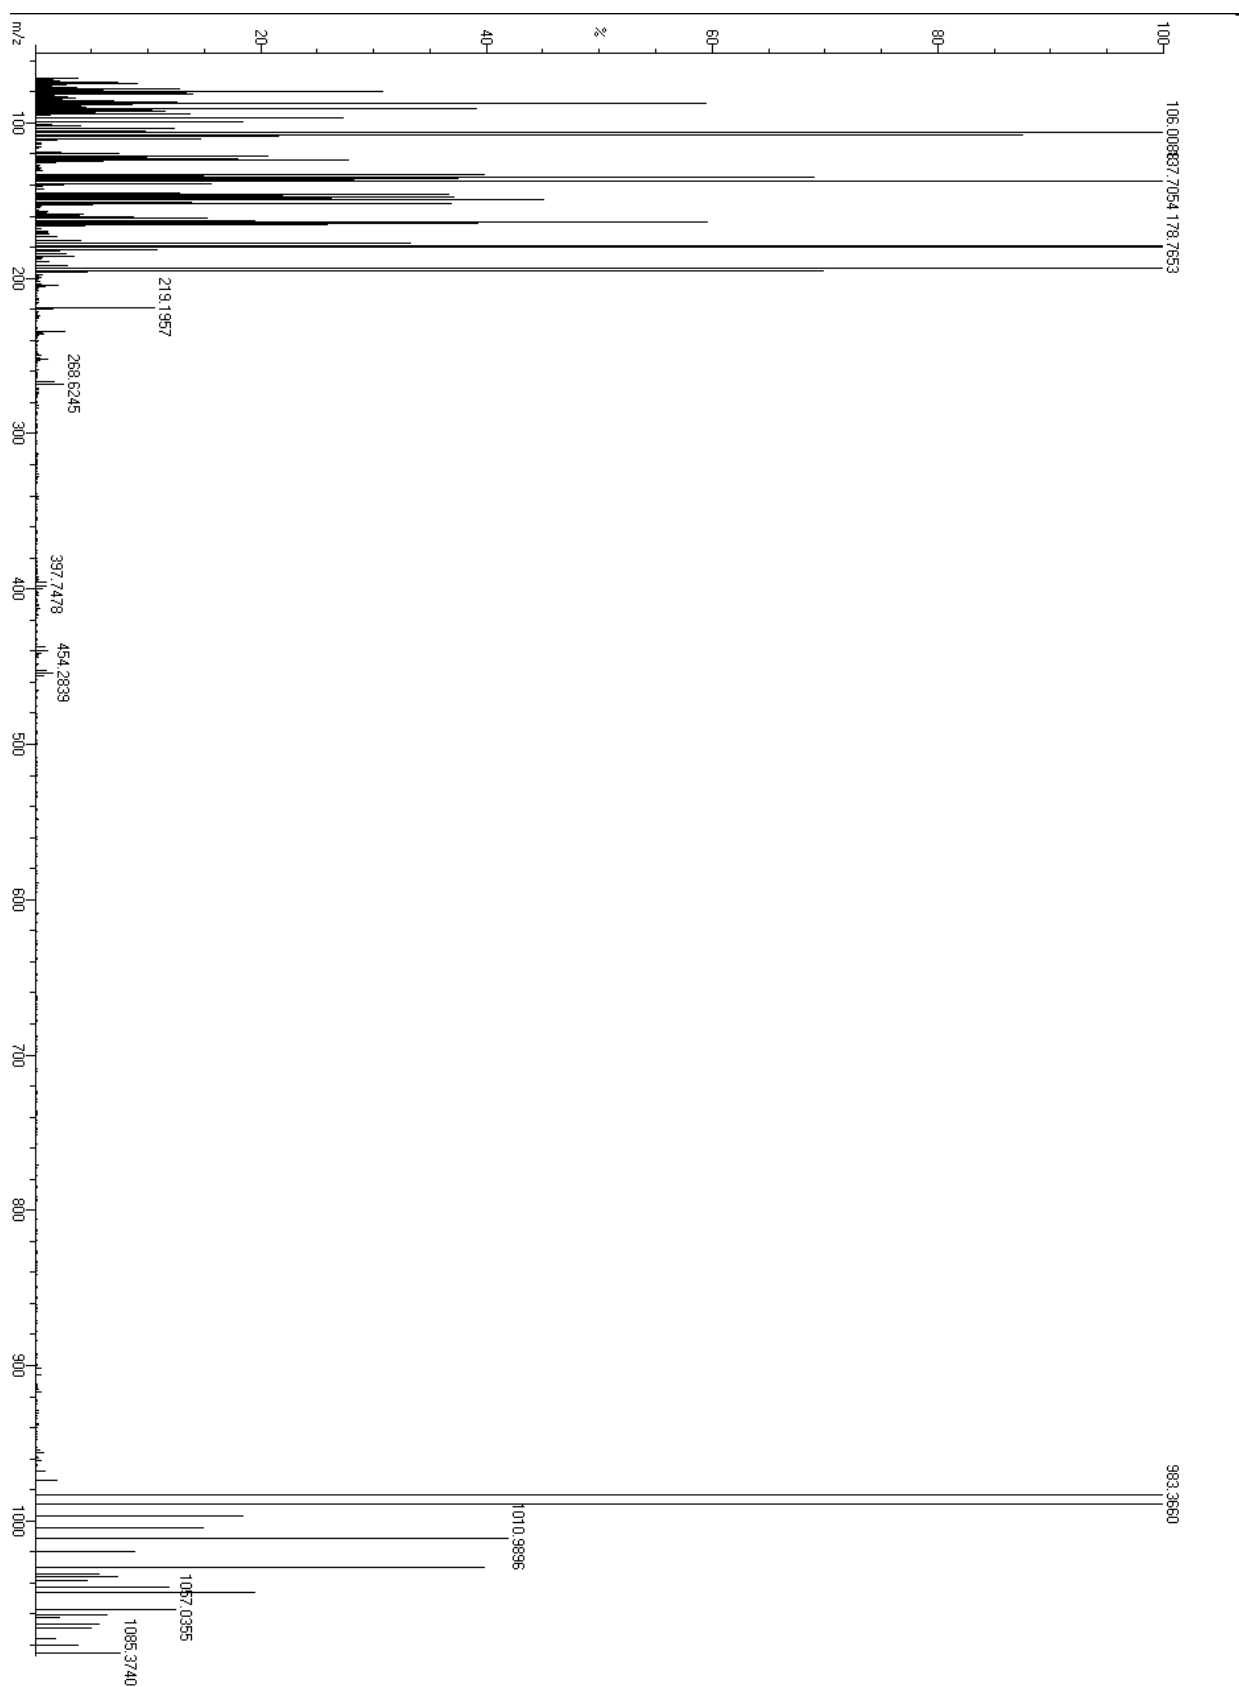

**Fig. S18.** ESI-Mass Spectrum of Compound 6

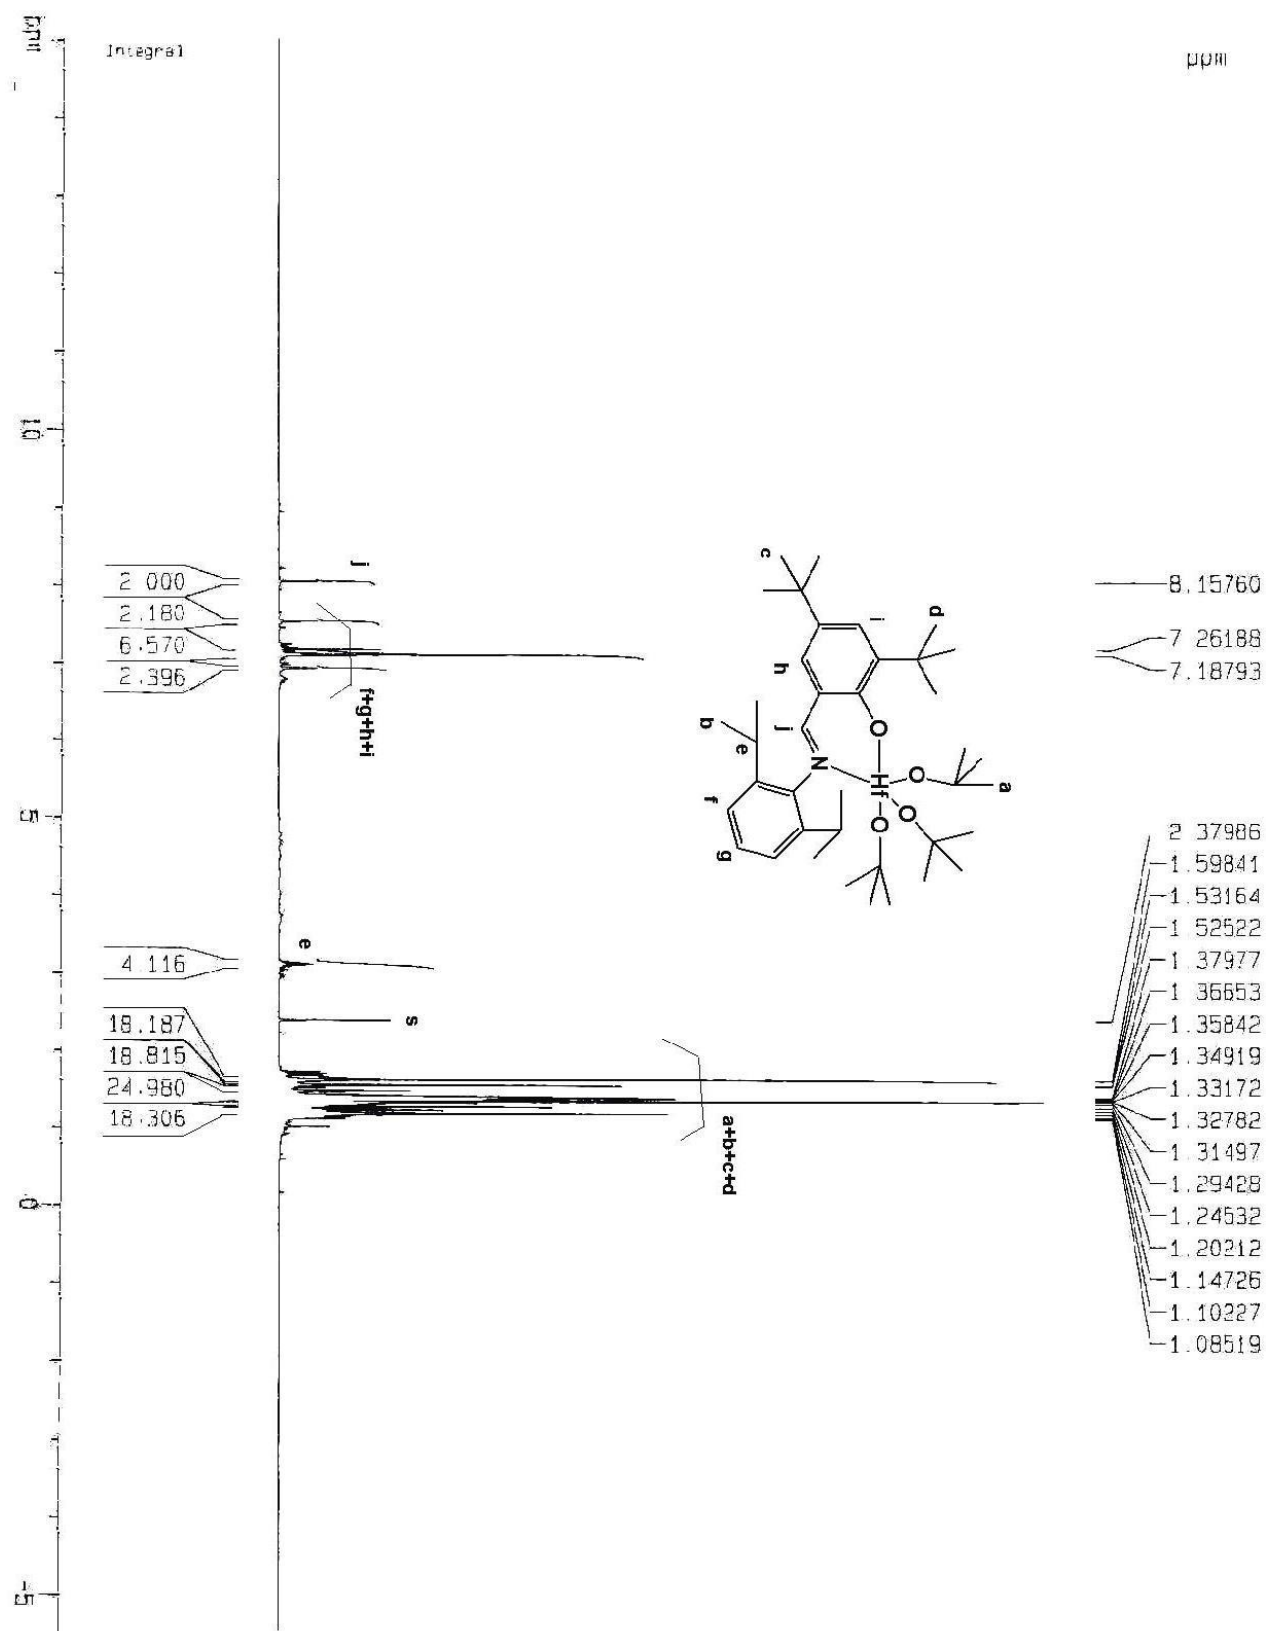

Fig. S19.  $^1\text{H}$  NMR (400 MHz,  $\text{CDCl}_3$ ) of Compound 7

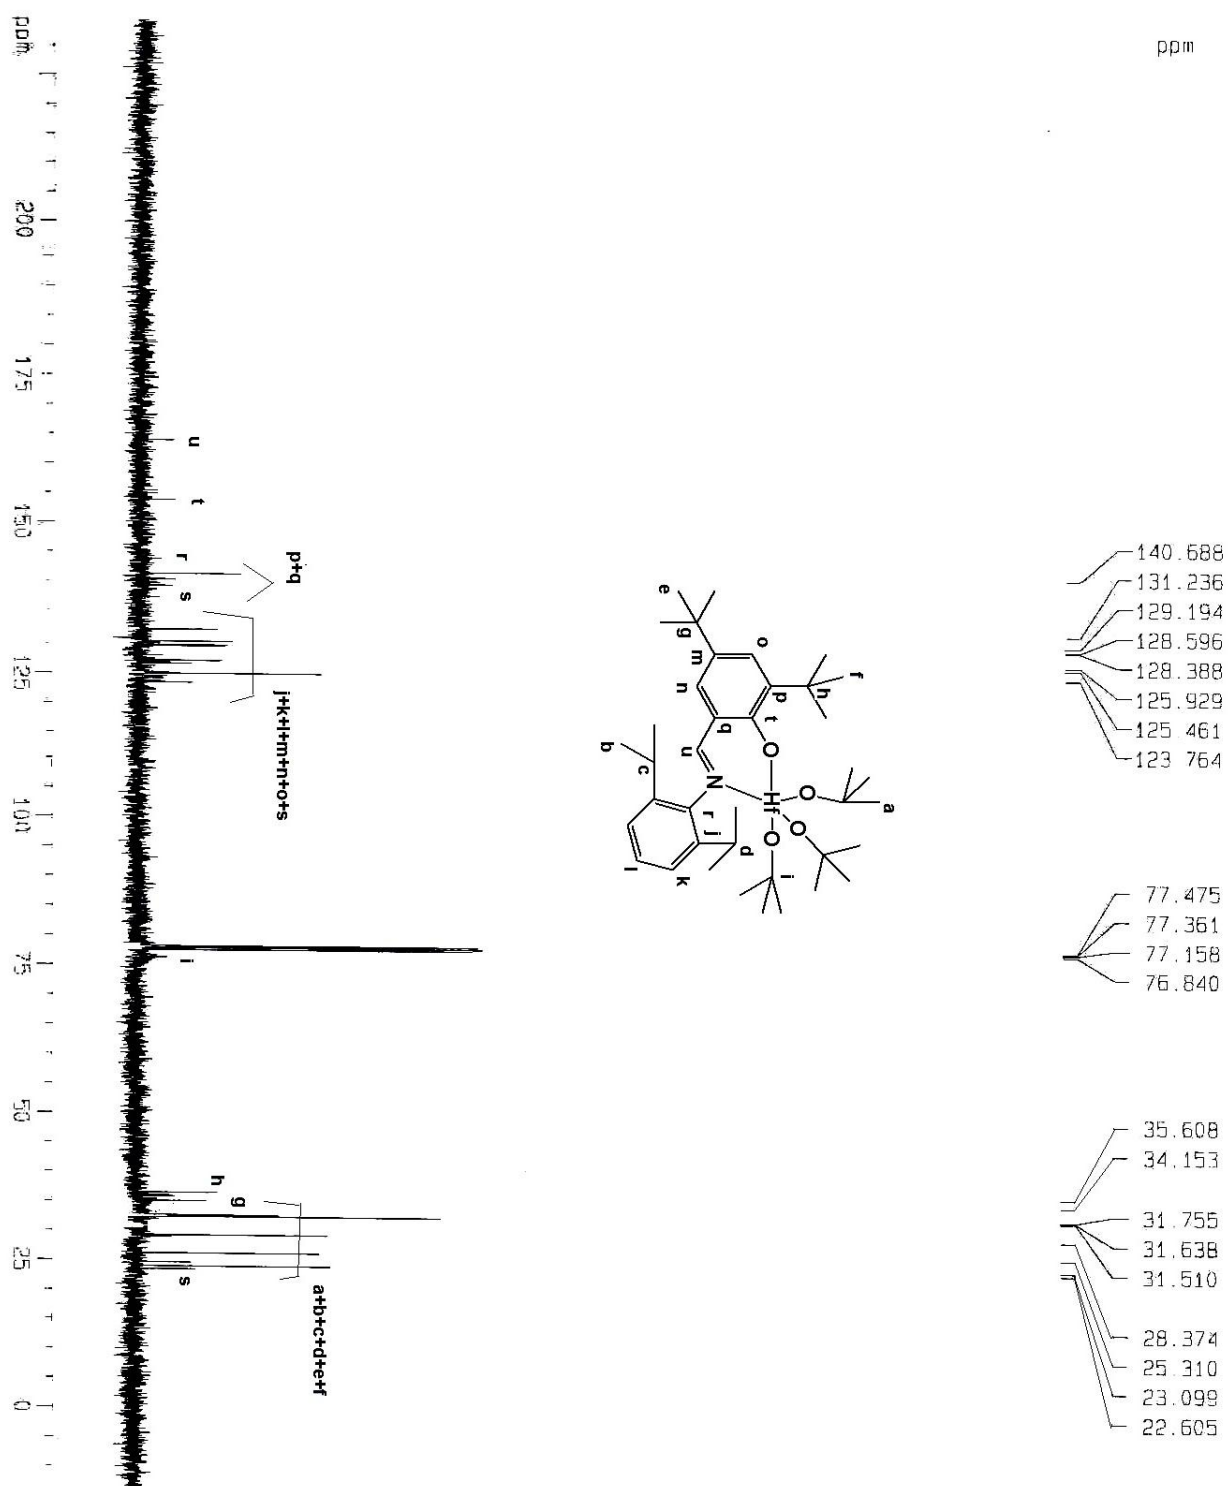

Fig. S20.  $^{13}\text{C}$  NMR (100 MHz,  $\text{CDCl}_3$ ) of Compound 7

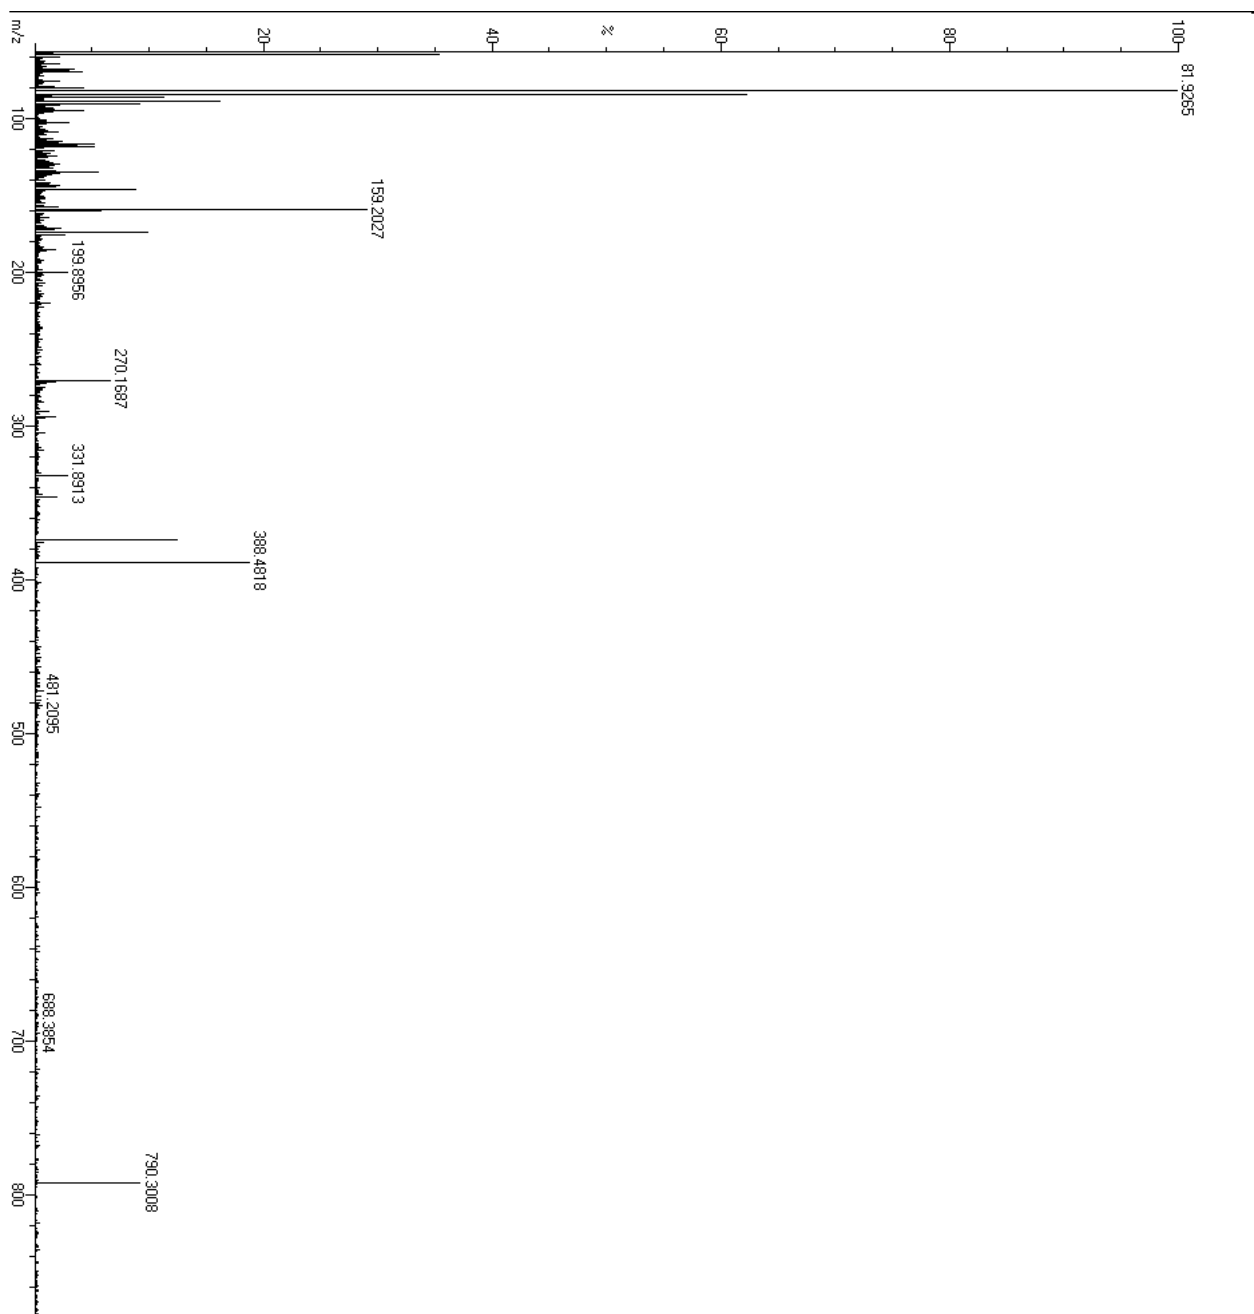

**Fig. S21.** ESI-Mass Spectrum of Compound 7

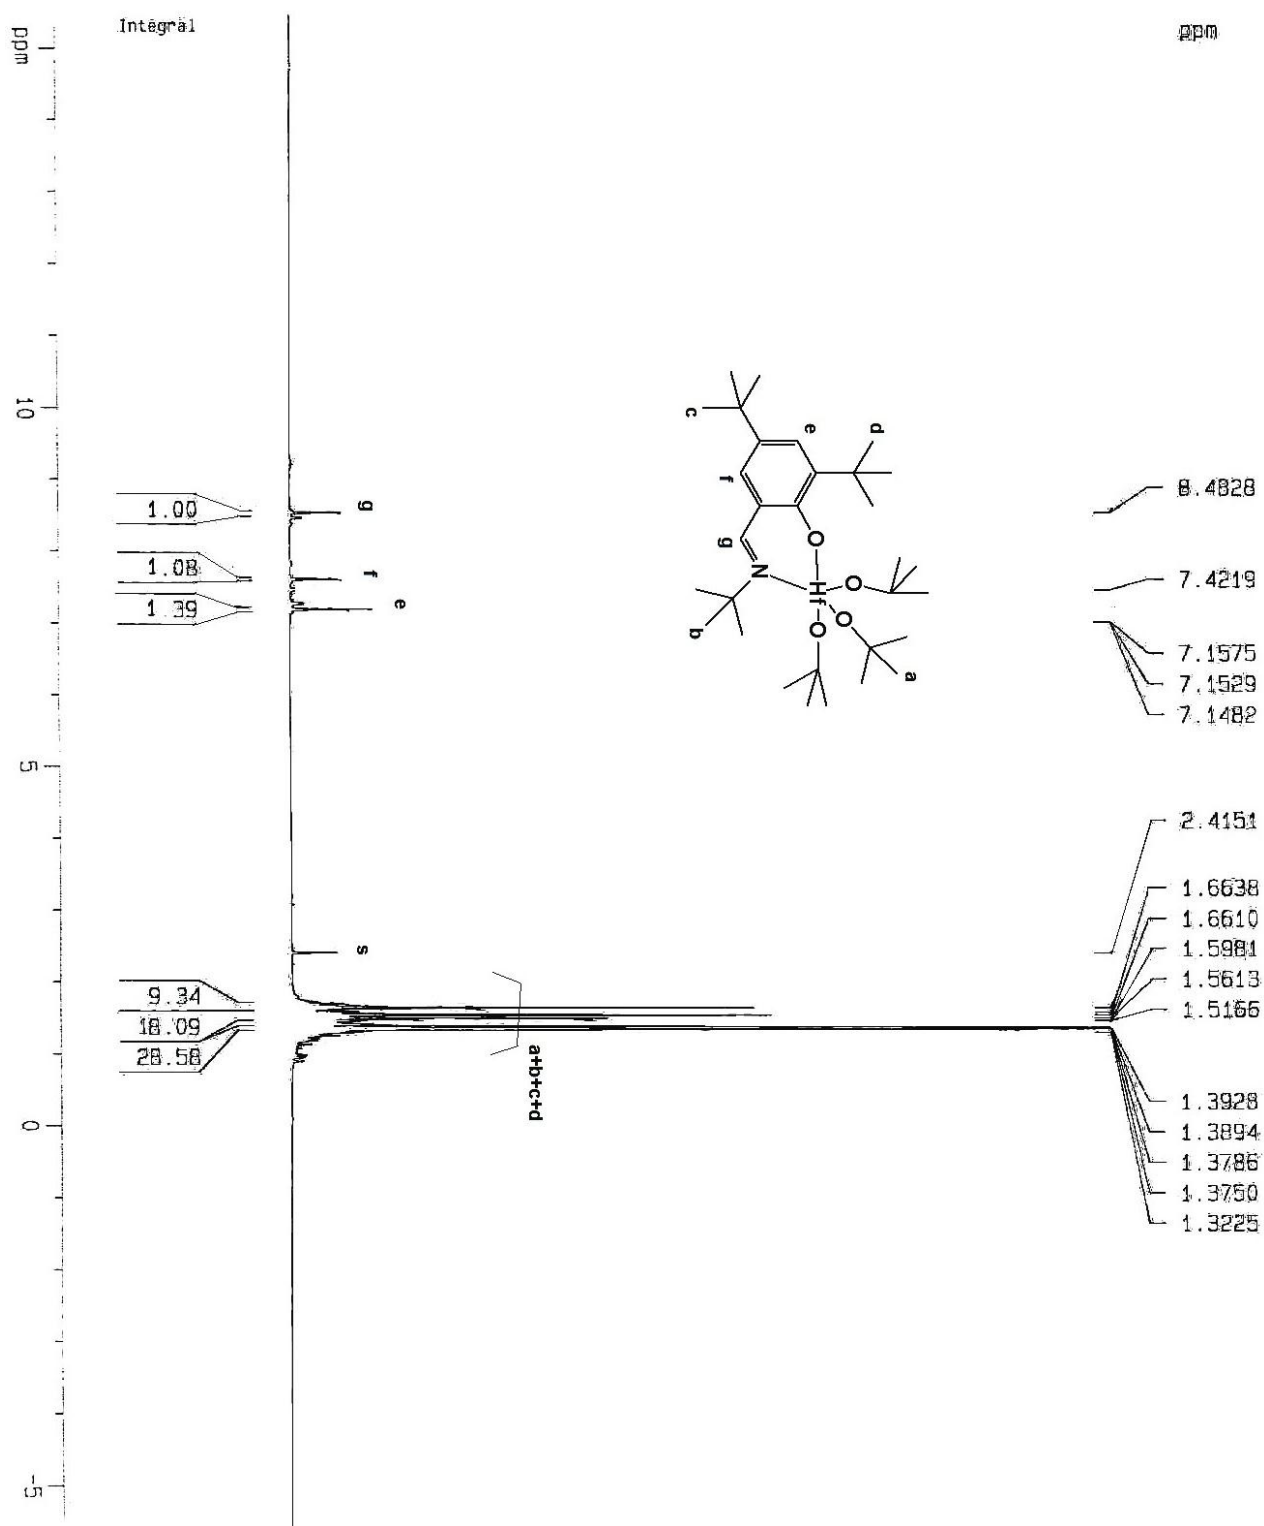

Fig. S22.  $^1\text{H}$  NMR (400 MHz,  $\text{CDCl}_3$ ) of Compound **8**

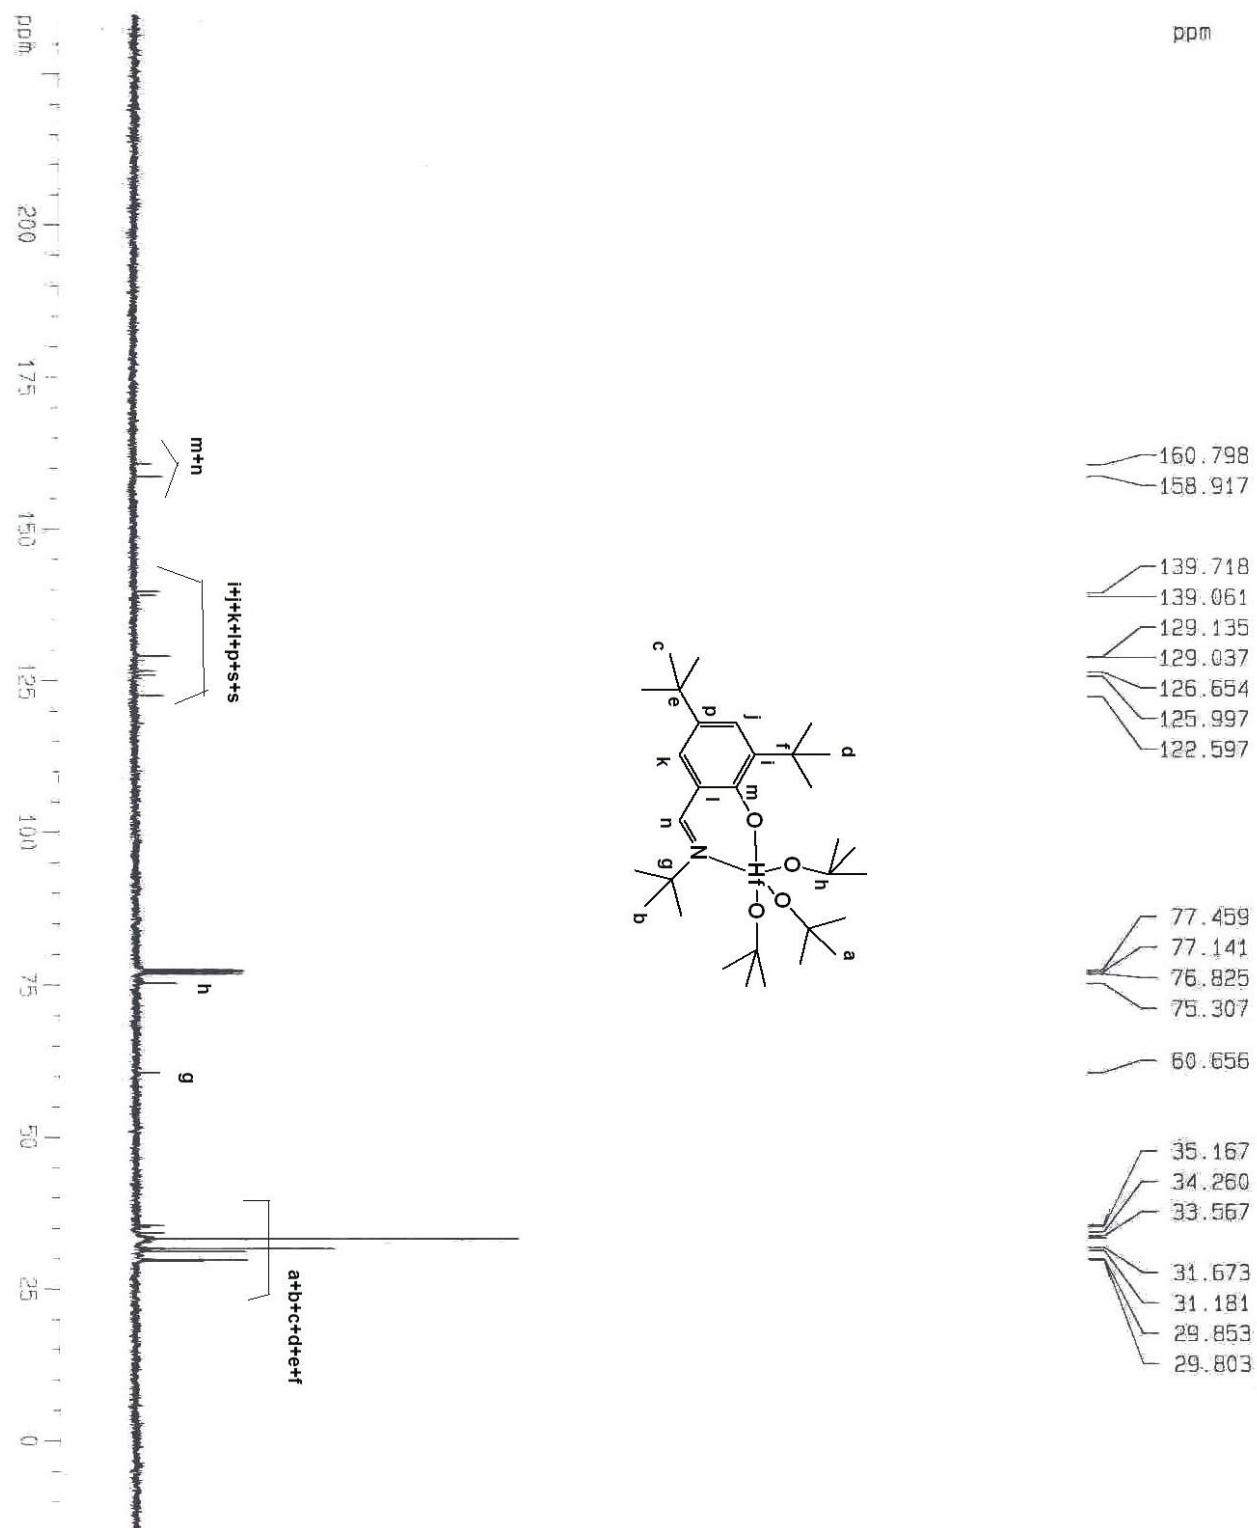

Fig. S23.  $^{13}\text{C}$  NMR (100 MHz,  $\text{CDCl}_3$ ) of Compound 8



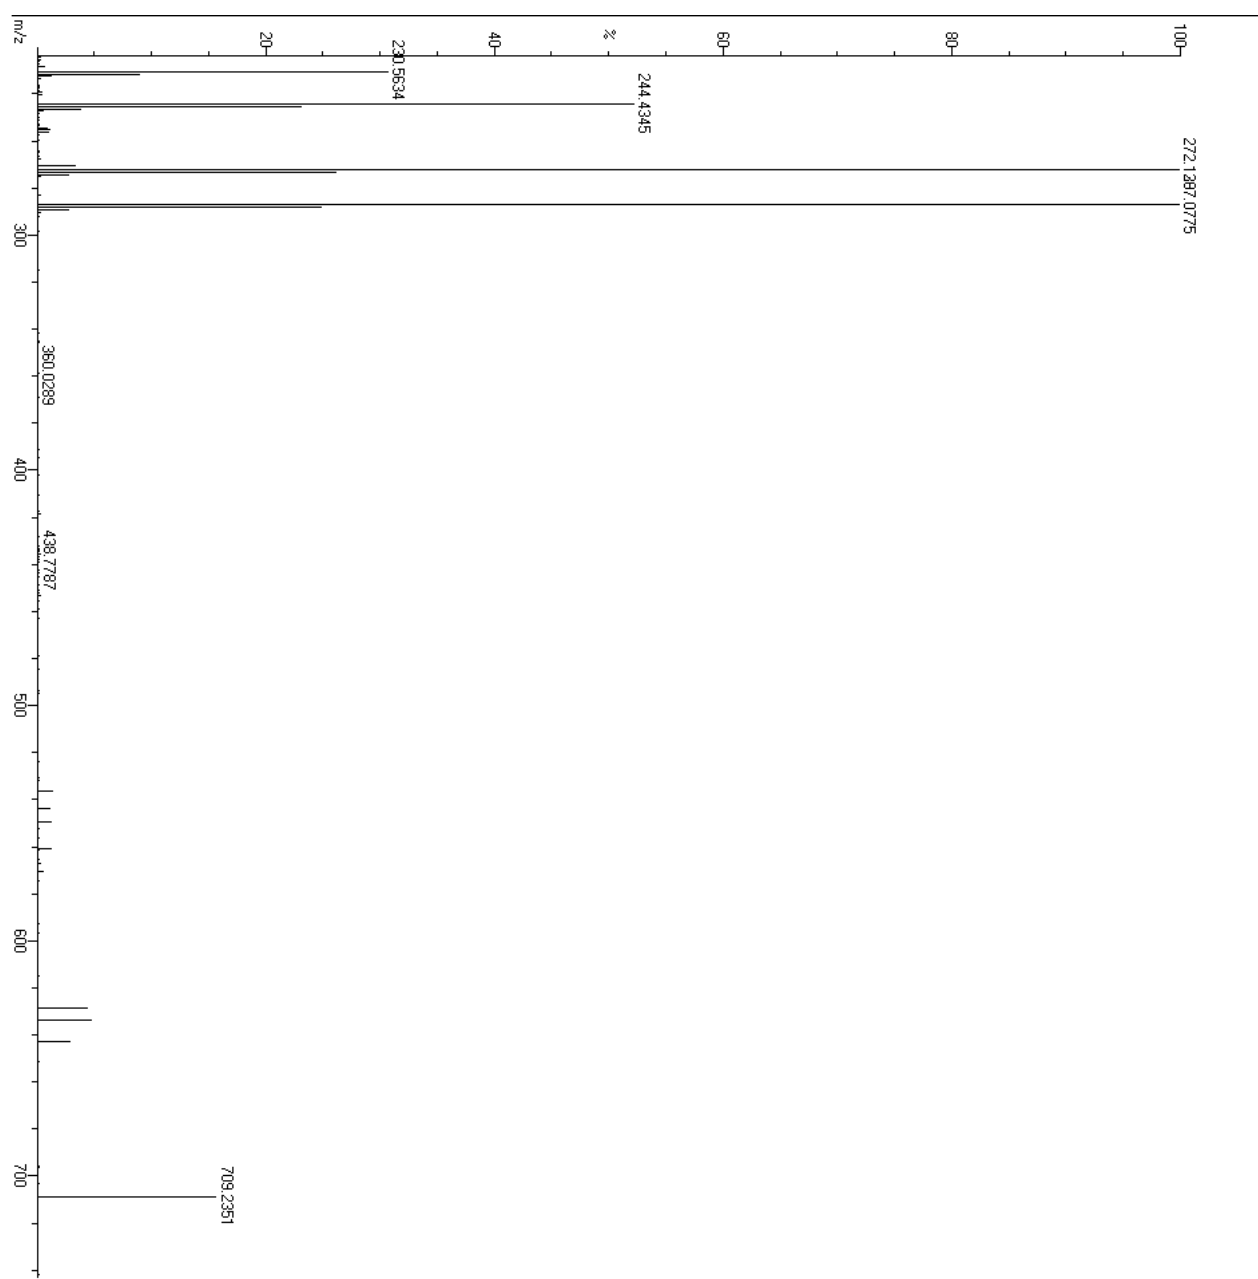

**Fig. S24.** ESI-Mass Spectrum of Compound 8

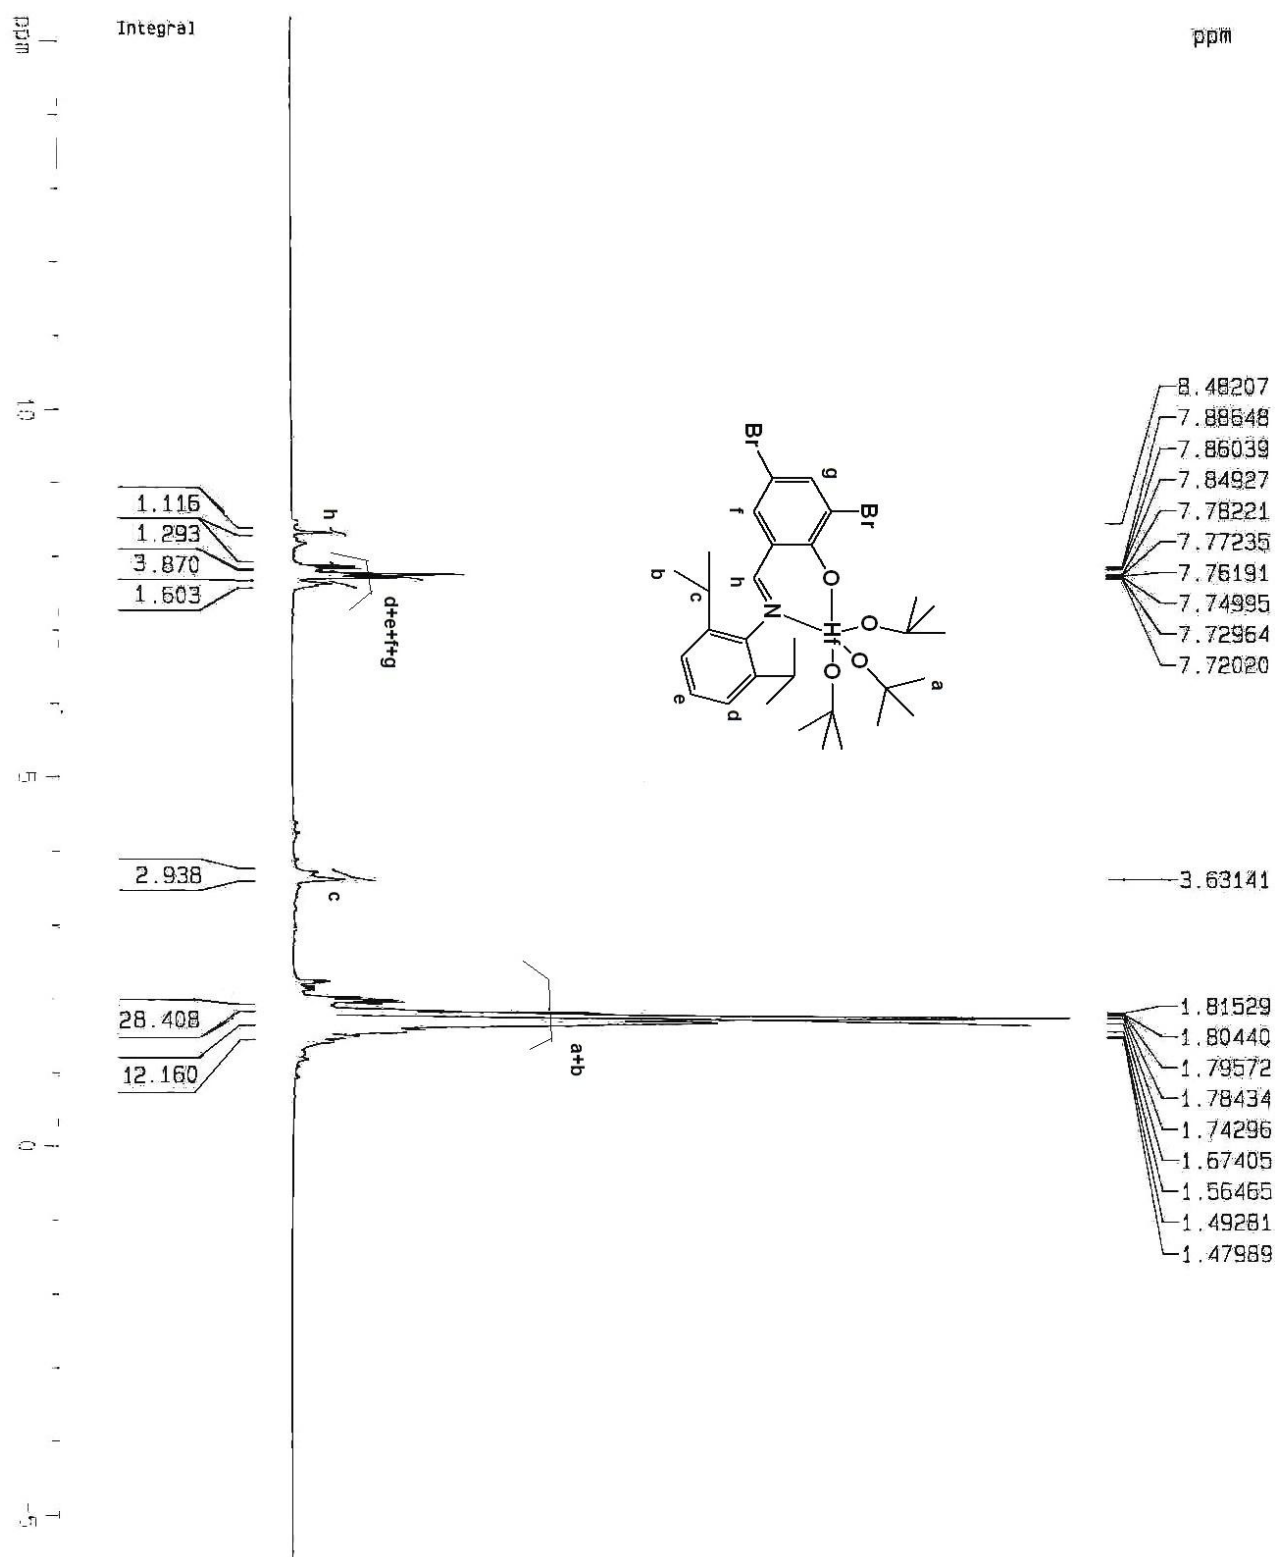

Fig. S25.  $^1\text{H}$  NMR (400 MHz,  $\text{CDCl}_3$ ) of Compound 9

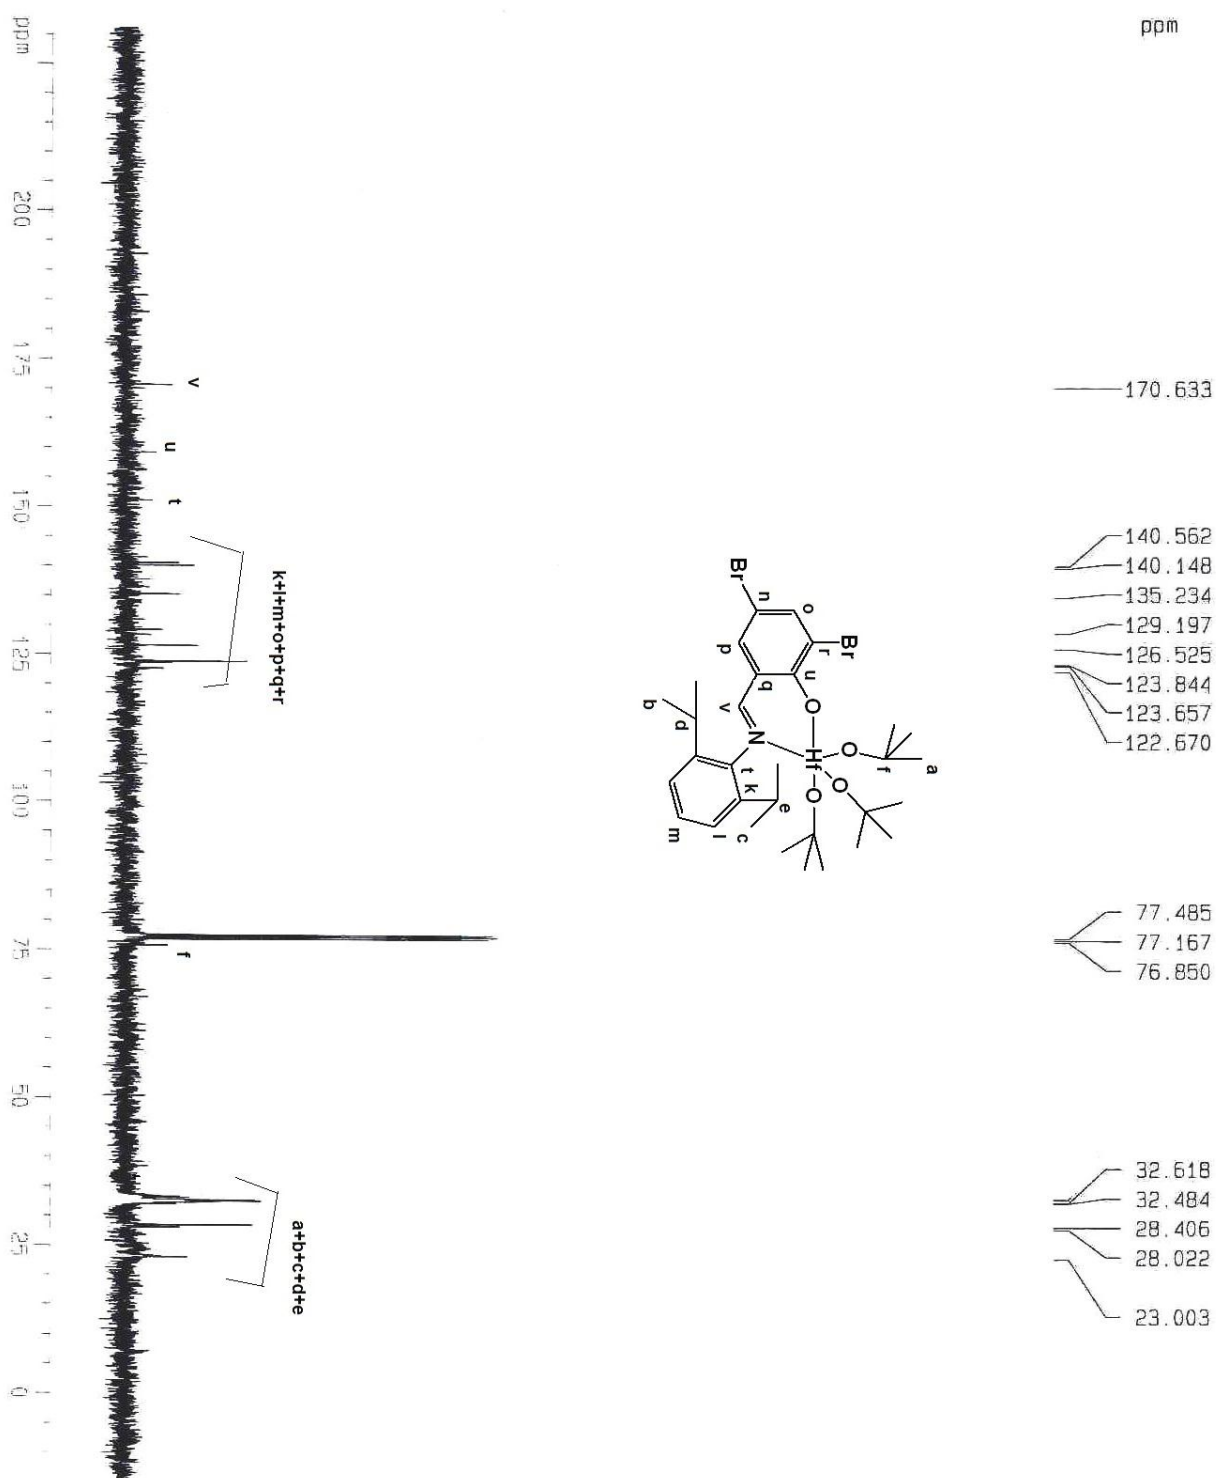

**Fig. S26.**  $^{13}\text{C}$  NMR (100 MHz,  $\text{CDCl}_3$ ) of Compound **9**

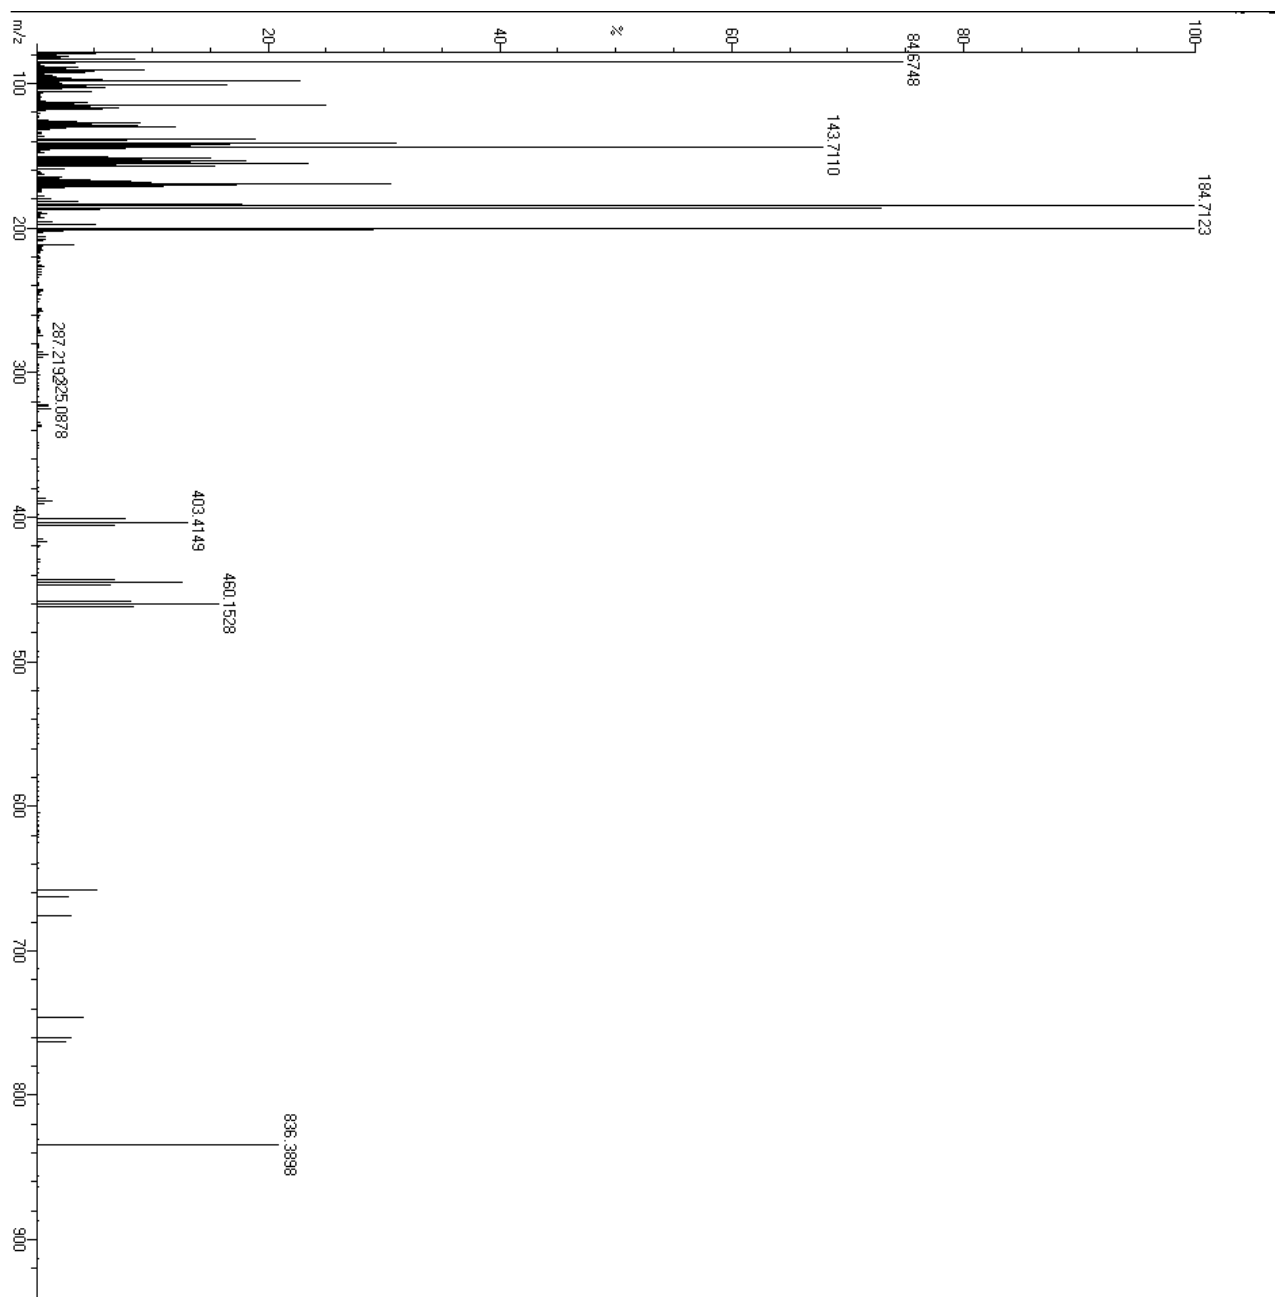

**Fig. S27.** ESI-Mass Spectrum of Compound **9**

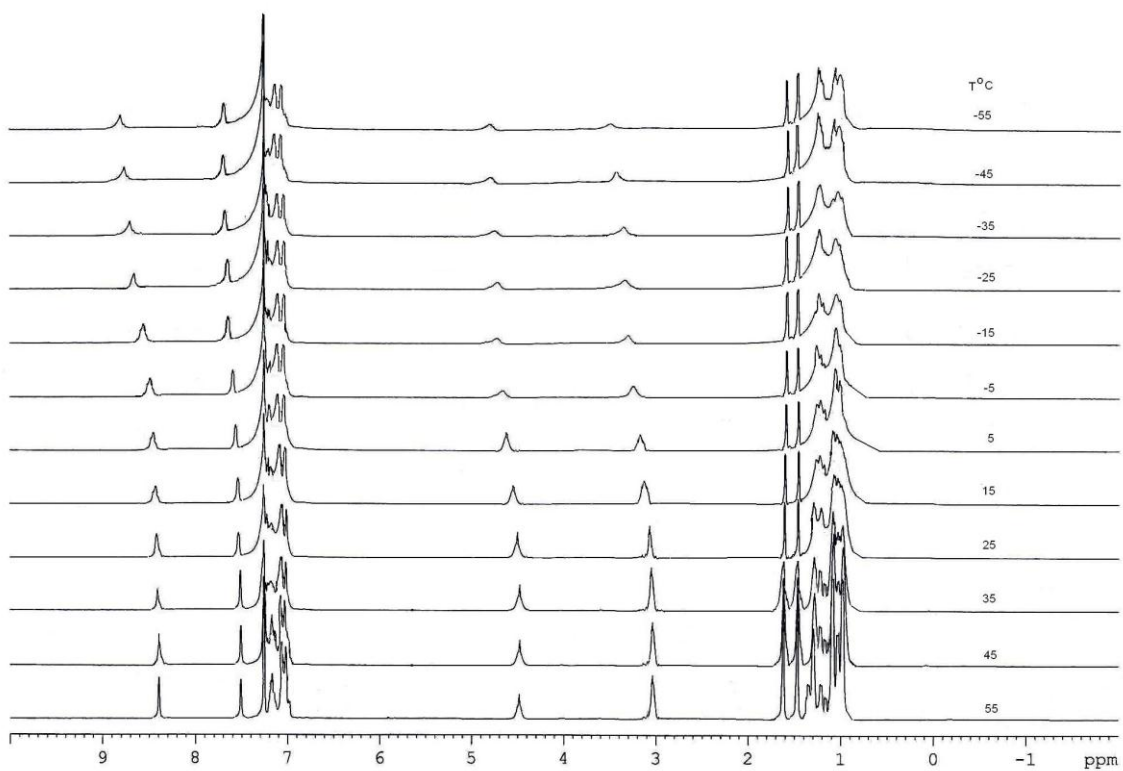

**Fig. S28.** Variable temperature <sup>1</sup>H NMR (400 MHz, CDCl<sub>3</sub>) of Compound **1**

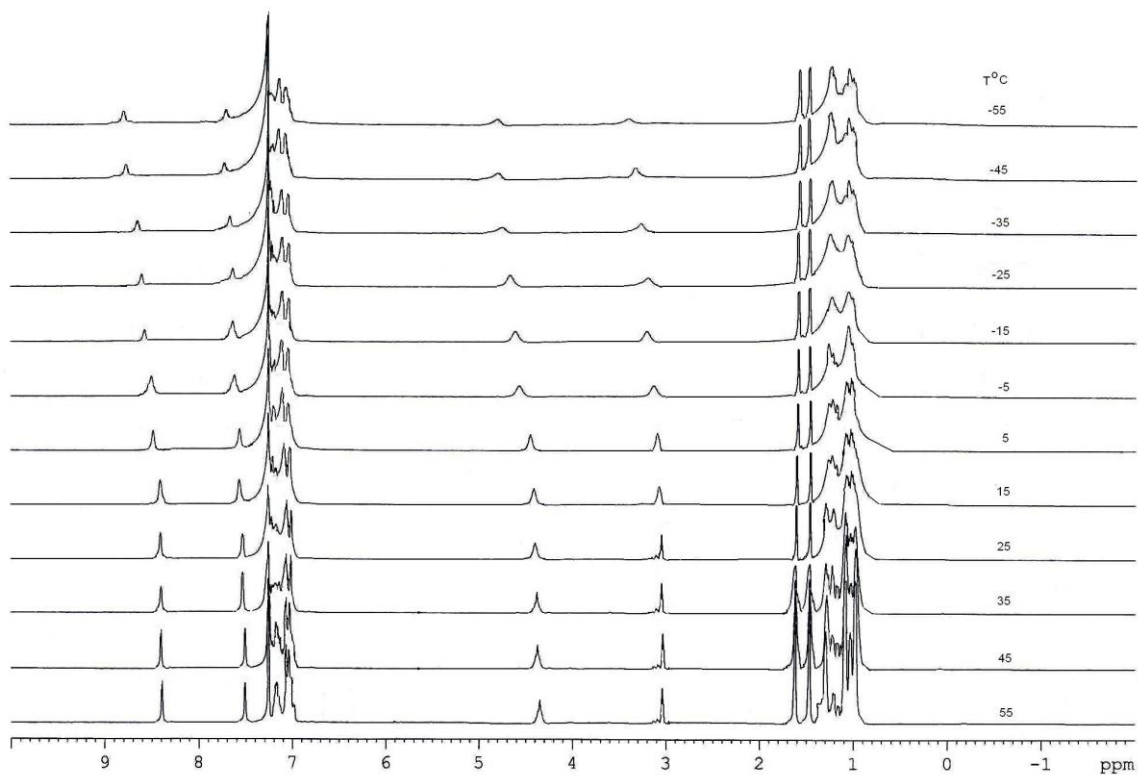

**Fig. S29.** Variable temperature <sup>1</sup>H NMR (400 MHz, CDCl<sub>3</sub>) of Compound **4**

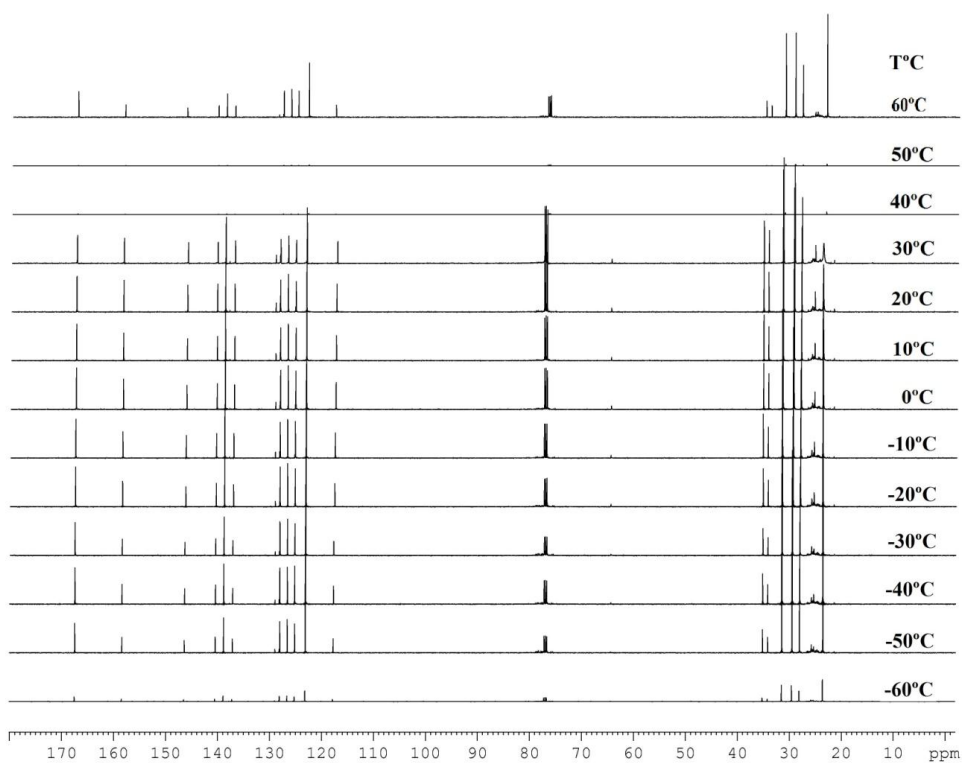

**Fig. S30.** Variable temperature  $^{13}\text{C}$  NMR (100 MHz,  $\text{CDCl}_3$ ) of Compound **1**

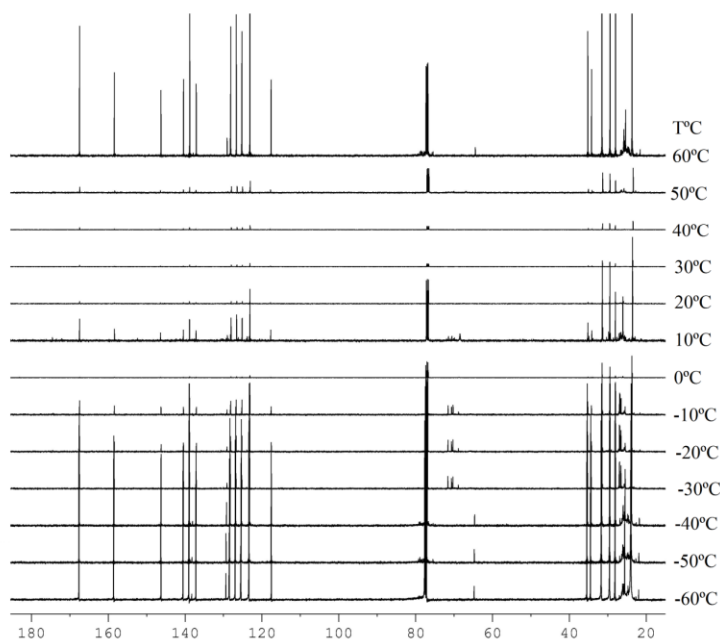

**Fig. S31.** Variable temperature  $^{13}\text{C}$  NMR (100 MHz,  $\text{CDCl}_3$ ) of Compound **4**

**Table** Solution polymerization data for *rac*-LA, *L*-LA and CL using **1–9** in 200:1 ratio at 80 °C

| Entry | Initiator | Monomer        | Yield (%) | Time <sup>a</sup> /min | <sup>b</sup> $M_n^{obs}/$<br>kgmol <sup>-1</sup> | <sup>c</sup> $M_n^{theo}/$<br>kgmol <sup>-1</sup> | $M_w/M_n$ | $P_r^d$ |
|-------|-----------|----------------|-----------|------------------------|--------------------------------------------------|---------------------------------------------------|-----------|---------|
| 1     | <b>1</b>  | <i>rac</i> -LA | 99        | 55                     | 30.22                                            | 28.89                                             | 1.03      | 0.68    |
| 2     | <b>2</b>  | <i>rac</i> -LA | 99        | 80                     | 29.94                                            | 28.89                                             | 1.02      | 0.69    |
| 3     | <b>3</b>  | <i>rac</i> -LA | 98        | 71                     | 30.12                                            | 28.89                                             | 1.04      | 0.70    |
| 4     | <b>4</b>  | <i>rac</i> -LA | 99        | 68                     | 31.25                                            | 28.89                                             | 1.02      | 0.72    |
| 5     | <b>5</b>  | <i>rac</i> -LA | 97        | 88                     | 30.46                                            | 28.89                                             | 1.04      | 0.71    |
| 6     | <b>6</b>  | <i>rac</i> -LA | 98        | 92                     | 30.64                                            | 28.89                                             | 1.05      | 0.74    |
| 7     | <b>7</b>  | <i>rac</i> -LA | 98        | 70                     | 31.39                                            | 28.89                                             | 1.02      | 0.68    |
| 8     | <b>8</b>  | <i>rac</i> -LA | 99        | 100                    | 30.05                                            | 28.89                                             | 1.03      | 0.70    |
| 9     | <b>9</b>  | <i>rac</i> -LA | 98        | 140                    | 31.56                                            | 28.89                                             | 1.06      | 0.66    |
| 10    | <b>1</b>  | <i>L</i> -LA   | 99        | 50                     | 31.23                                            | 28.89                                             | 1.02      |         |
| 11    | <b>2</b>  | <i>L</i> -LA   | 99        | 74                     | 30.45                                            | 28.89                                             | 1.03      |         |
| 12    | <b>3</b>  | <i>L</i> -LA   | 99        | 60                     | 29.22                                            | 28.89                                             | 1.02      |         |
| 13    | <b>4</b>  | <i>L</i> -LA   | 97        | 78                     | 29.62                                            | 28.89                                             | 1.04      |         |
| 14    | <b>5</b>  | <i>L</i> -LA   | 98        | 88                     | 31.98                                            | 28.89                                             | 1.05      |         |
| 15    | <b>6</b>  | <i>L</i> -LA   | 97        | 76                     | 30.21                                            | 28.89                                             | 1.07      |         |
| 16    | <b>7</b>  | <i>L</i> -LA   | 98        | 105                    | 29.34                                            | 28.89                                             | 1.08      |         |
| 17    | <b>8</b>  | <i>L</i> -LA   | 98        | 134                    | 30.66                                            | 28.89                                             | 1.06      |         |
| 18    | <b>9</b>  | <i>L</i> -LA   | 98        | 138                    | 29.11                                            | 28.89                                             | 1.05      |         |
| 19    | <b>1</b>  | CL             | 99        | 44                     | 24.59                                            | 22.83                                             | 1.03      |         |
| 20    | <b>2</b>  | CL             | 99        | 64                     | 23.98                                            | 22.83                                             | 1.05      |         |
| 21    | <b>3</b>  | CL             | 99        | 48                     | 25.17                                            | 22.83                                             | 1.06      |         |
| 22    | <b>4</b>  | CL             | 99        | 49                     | 25.02                                            | 22.83                                             | 1.02      |         |
| 23    | <b>5</b>  | CL             | 98        | 82                     | 24.64                                            | 22.83                                             | 1.04      |         |
| 24    | <b>6</b>  | CL             | 98        | 60                     | 21.32                                            | 22.83                                             | 1.03      |         |
| 25    | <b>7</b>  | CL             | 97        | 77                     | 24.79                                            | 22.83                                             | 1.03      |         |
| 26    | <b>8</b>  | CL             | 99        | 97                     | 25.11                                            | 22.83                                             | 1.02      |         |
| 27    | <b>9</b>  | CL             | 98        | 87                     | 25.78                                            | 22.83                                             | 1.05      |         |

<sup>a</sup>Time of polymerization measured by quenching the polymerization reaction when all monomer was found consumed. <sup>b</sup>Measured by GPC at 27 °C in THF relative to polystyrene standards with Mark-Houwink corrections for  $M_n$  for LA polymerization. <sup>c</sup> $M_n$  (theoretical) at 100 % conversion =  $[M]_o/[C]_o \times \text{mol wt (monomer)} + M_{\text{end groups}}$  <sup>d</sup>Calculated from homonuclear decoupled <sup>1</sup>H NMR spectrum.

**Table** Solution polymerization data for *rac*-LA, *L*-LA and CL using **1–9** in the presence of benzyl alcohol in 200:1:5 ratio at 80 °C

| Entry | Initiator | Monomer        | Yield (%) | Time <sup>a</sup> /min | <sup>b</sup> $M_n^{obs}/$ kgmol <sup>-1</sup> | <sup>c</sup> $M_n^{theo}/$ kgmol <sup>-1</sup> | $M_w/M_n$ | $P_r^d$ |
|-------|-----------|----------------|-----------|------------------------|-----------------------------------------------|------------------------------------------------|-----------|---------|
| 1     | <b>1</b>  | <i>rac</i> -LA | 98        | 25                     | 6.89                                          | 5.76                                           | 1.10      | 0.69    |
| 2     | <b>2</b>  | <i>rac</i> -LA | 99        | 32                     | 6.81                                          | 5.76                                           | 1.11      | 0.71    |
| 3     | <b>3</b>  | <i>rac</i> -LA | 99        | 27                     | 6.02                                          | 5.76                                           | 1.13      | 0.70    |
| 4     | <b>4</b>  | <i>rac</i> -LA | 99        | 21                     | 6.92                                          | 5.76                                           | 1.10      | 0.74    |
| 5     | <b>5</b>  | <i>rac</i> -LA | 98        | 29                     | 7.05                                          | 5.76                                           | 1.11      | 0.72    |
| 6     | <b>6</b>  | <i>rac</i> -LA | 99        | 31                     | 6.99                                          | 5.76                                           | 1.12      | 0.71    |
| 7     | <b>7</b>  | <i>rac</i> -LA | 97        | 24                     | 6.11                                          | 5.76                                           | 1.13      | 0.69    |
| 8     | <b>8</b>  | <i>rac</i> -LA | 97        | 35                     | 7.07                                          | 5.76                                           | 1.11      | 0.70    |
| 9     | <b>9</b>  | <i>rac</i> -LA | 98        | 48                     | 7.04                                          | 5.76                                           | 1.14      | 0.69    |
| 10    | <b>1</b>  | <i>L</i> -LA   | 99        | 17                     | 6.48                                          | 5.76                                           | 1.11      |         |
| 11    | <b>2</b>  | <i>L</i> -LA   | 99        | 24                     | 6.59                                          | 5.76                                           | 1.12      |         |
| 12    | <b>3</b>  | <i>L</i> -LA   | 97        | 18                     | 7.35                                          | 5.76                                           | 1.14      |         |
| 13    | <b>4</b>  | <i>L</i> -LA   | 97        | 28                     | 7.21                                          | 5.76                                           | 1.13      |         |
| 14    | <b>5</b>  | <i>L</i> -LA   | 99        | 32                     | 6.78                                          | 5.76                                           | 1.14      |         |
| 15    | <b>6</b>  | <i>L</i> -LA   | 99        | 26                     | 7.44                                          | 5.76                                           | 1.11      |         |
| 16    | <b>7</b>  | <i>L</i> -LA   | 99        | 37                     | 6.66                                          | 5.76                                           | 1.12      |         |
| 17    | <b>8</b>  | <i>L</i> -LA   | 98        | 42                     | 7.34                                          | 5.76                                           | 1.10      |         |
| 18    | <b>9</b>  | <i>L</i> -LA   | 98        | 47                     | 7.56                                          | 5.76                                           | 1.10      |         |
| 19    | <b>1</b>  | CL             | 97        | 13                     | 6.73                                          | 4.56                                           | 1.13      |         |
| 20    | <b>2</b>  | CL             | 98        | 20                     | 5.55                                          | 4.56                                           | 1.13      |         |
| 21    | <b>3</b>  | CL             | 98        | 17                     | 5.69                                          | 4.56                                           | 1.11      |         |
| 22    | <b>4</b>  | CL             | 99        | 19                     | 7.13                                          | 4.56                                           | 1.15      |         |
| 23    | <b>5</b>  | CL             | 98        | 26                     | 6.33                                          | 4.56                                           | 1.11      |         |
| 24    | <b>6</b>  | CL             | 99        | 18                     | 7.01                                          | 4.56                                           | 1.10      |         |
| 25    | <b>7</b>  | CL             | 99        | 26                     | 6.47                                          | 4.56                                           | 1.13      |         |
| 26    | <b>8</b>  | CL             | 98        | 32                     | 7.08                                          | 4.56                                           | 1.12      |         |
| 27    | <b>9</b>  | CL             | 98        | 29                     | 6.18                                          | 4.56                                           | 1.11      |         |

<sup>a</sup>Time of polymerization measured by quenching the polymerization reaction when all monomer was found consumed. <sup>b</sup>Measured by GPC at 27 °C in THF relative to polystyrene standards with Mark-Houwink corrections for  $M_n$  for LA polymerization. <sup>c</sup> $M_n$  (theoretical) at 100 % conversion =  $[M]_0/[C]_0 \times \text{mol wt (monomer)} + 108.14$ . <sup>d</sup>Calculated from homonuclear decoupled <sup>1</sup>H NMR spectrum.



**Table** Polymerization data based on changing [*rac*-LA]/[C] ratio in case of *rac*-LA using **3**, **6** and **9** at 130 °C

| Entry | Initiator | [M]/[C]<br>ratio | Time <sup>a</sup> /min | Yield (%) | $M_n^b$ /<br>kgmol <sup>-1</sup> | $M_w/M_n$ |
|-------|-----------|------------------|------------------------|-----------|----------------------------------|-----------|
| 1     | <b>3</b>  | 200              | 14                     | 99        | 41.62                            | 1.13      |
| 2     | <b>3</b>  | 400              | 32                     | 98        | 82.22                            | 1.14      |
| 3     | <b>3</b>  | 600              | 55                     | 97        | 119.72                           | 1.16      |
| 4     | <b>3</b>  | 800              | 70                     | 99        | 155.89                           | 1.18      |
| 5     | <b>3</b>  | 1000             | 85                     | 98        | 212.14                           | 1.20      |
| 6     | <b>3</b>  | 1200             | 140                    | 99        | 253.67                           | 1.21      |
| 7     | <b>6</b>  | 200              | 18                     | 97        | 82.52                            | 1.12      |
| 8     | <b>6</b>  | 400              | 35                     | 98        | 150.79                           | 1.14      |
| 9     | <b>6</b>  | 600              | 62                     | 99        | 240.25                           | 1.15      |
| 10    | <b>6</b>  | 800              | 81                     | 99        | 326.74                           | 1.17      |
| 11    | <b>6</b>  | 1000             | 105                    | 98        | 415.52                           | 1.19      |
| 12    | <b>6</b>  | 1200             | 162                    | 95        | 499.31                           | 1.22      |
| 13    | <b>9</b>  | 200              | 29                     | 99        | 41.44                            | 1.18      |
| 14    | <b>9</b>  | 400              | 62                     | 97        | 83.98                            | 1.20      |
| 15    | <b>9</b>  | 600              | 95                     | 96        | 128.43                           | 1.23      |
| 16    | <b>9</b>  | 800              | 130                    | 98        | 160.69                           | 1.25      |
| 17    | <b>9</b>  | 1000             | 165                    | 98        | 205.52                           | 1.27      |
| 18    | <b>9</b>  | 1200             | 195                    | 97        | 252.76                           | 1.30      |

<sup>a</sup>Time of polymerization measured by quenching the polymerization reaction when all monomer was found consumed. <sup>b</sup>Measured by GPC at 27 °C in THF relative to polystyrene standards with Mark-Houwink corrections for  $M_n$  for LA polymerization. [M] = number of moles of monomer, [C] = number of moles of catalyst

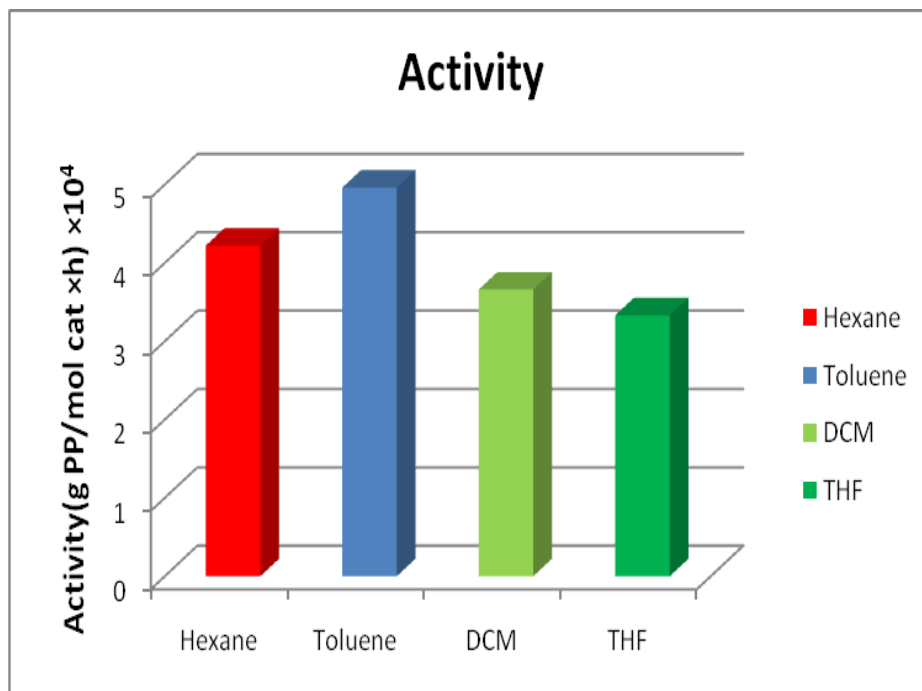

Fig. S32. Activity of 4 in different solvent in propylene polymerization

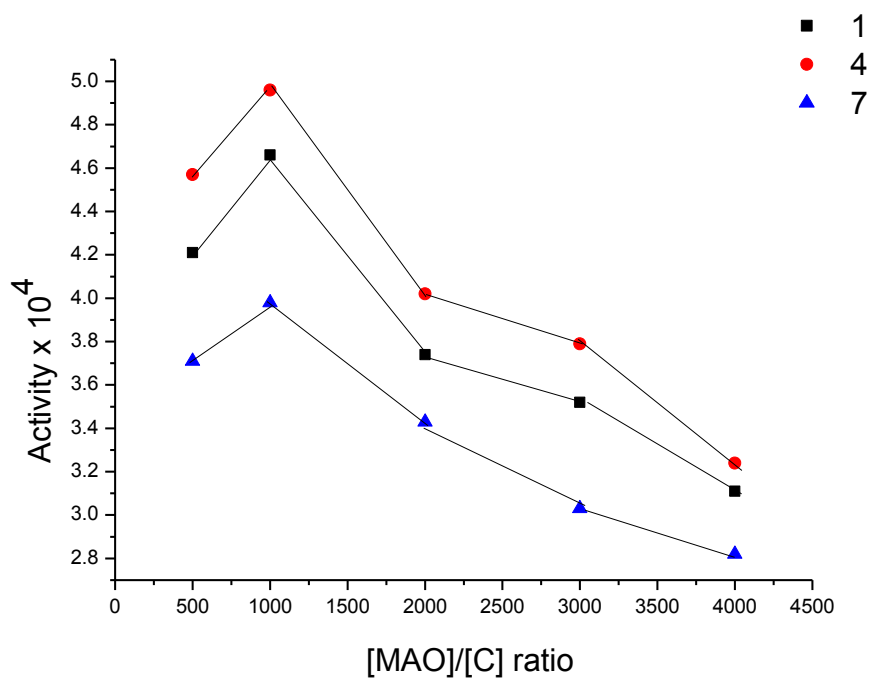

Fig. S33. Plot of activity vs [MAO]/[C] ratio for 1, 4 and 7 for propylene polymerization

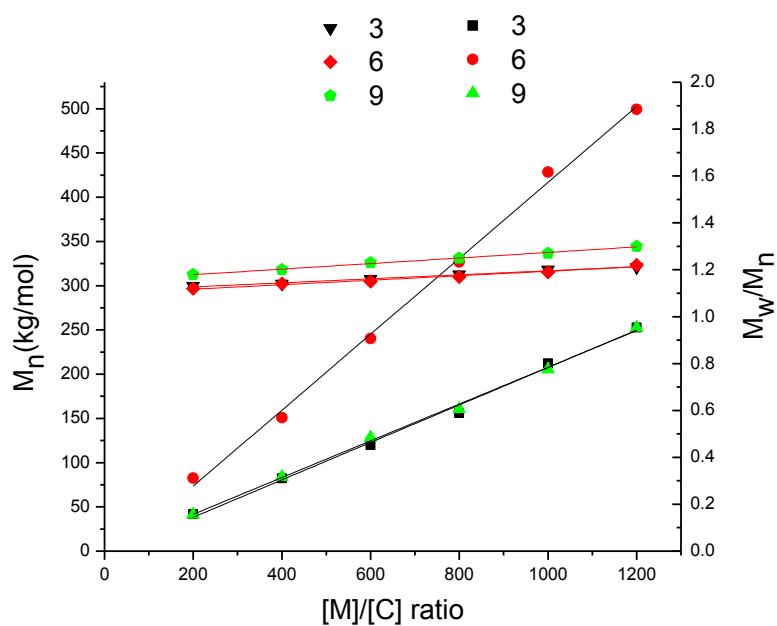

**Fig. S34.** Plot of  $M_n$  and  $M_w/M_n$  vs.  $[M]_0/[C]_0$  for *rac*-LA polymerization at 130 °C using **3**, **6** and **9**

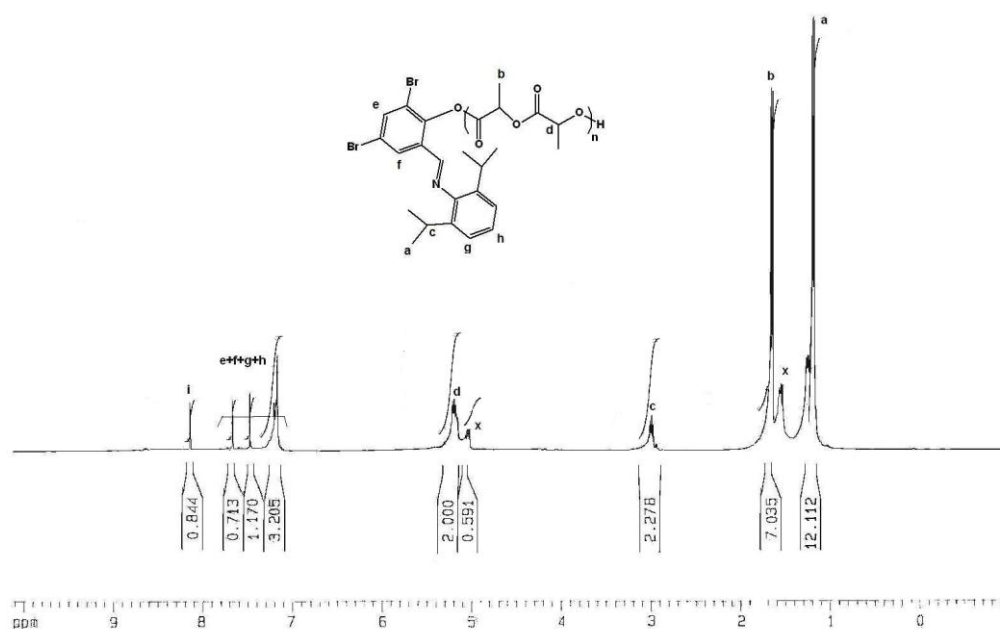

**Fig. S35.**  $^1\text{H}$  NMR spectrum of the crude product obtained from a reaction between *rac*-LA and **6** in 10:1 ratio (x = peaks corresponding to *rac*-LA)

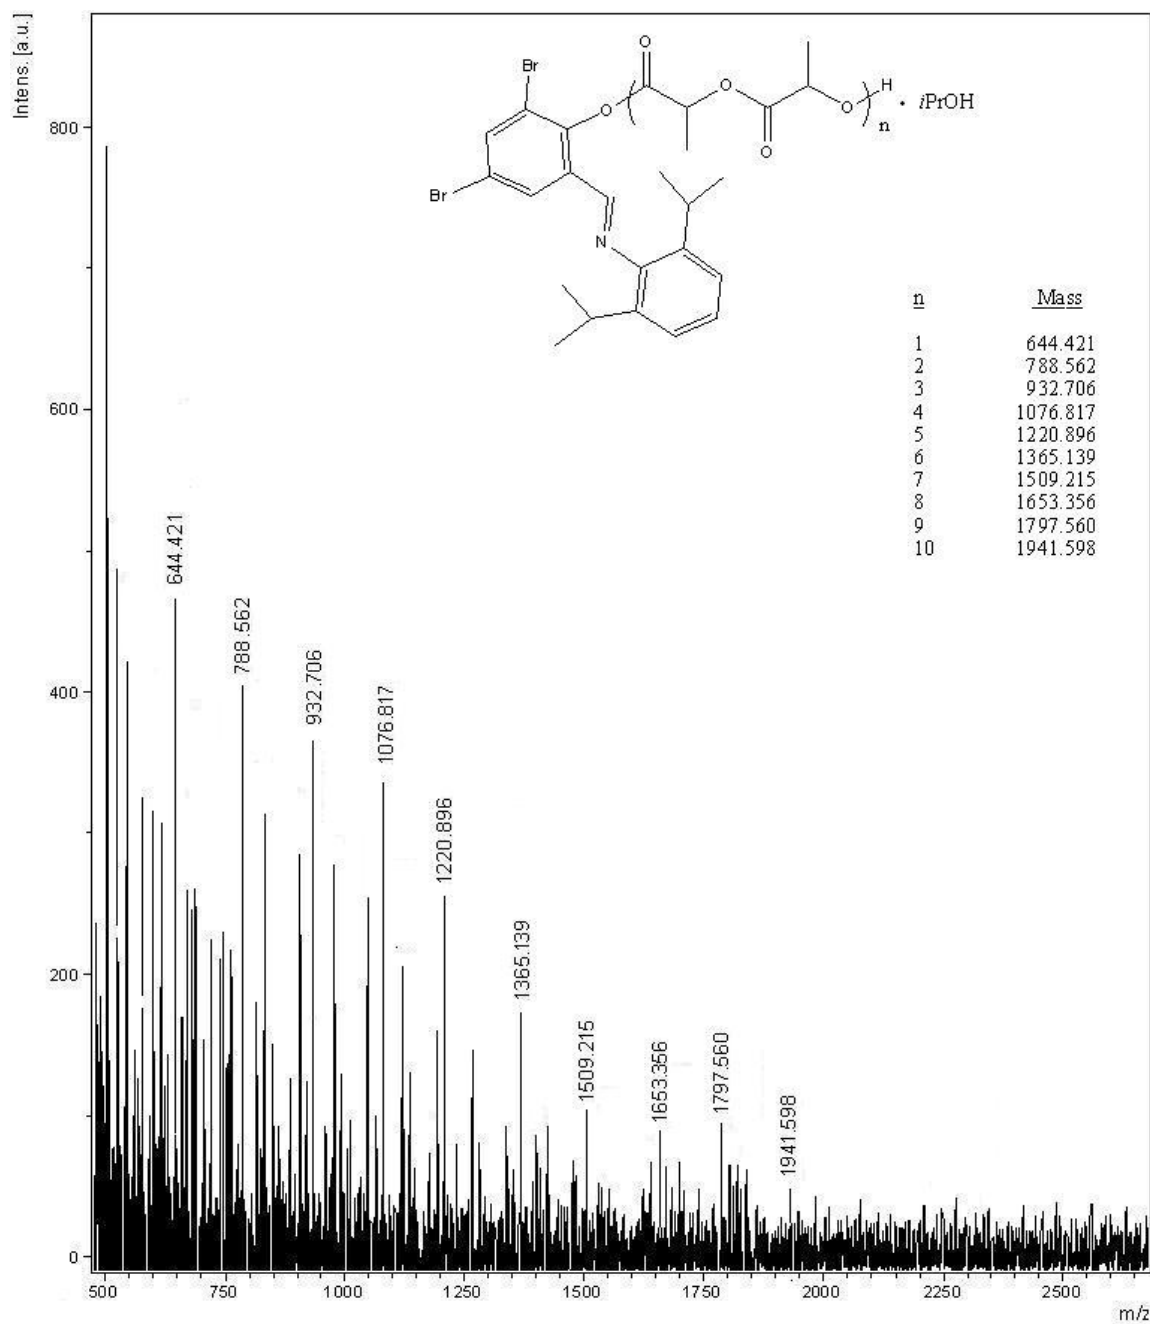

**Fig.S36.** MALDI-TOF of the crude product obtained from a reaction between *rac*-LA and **6** in 10:1 ratio

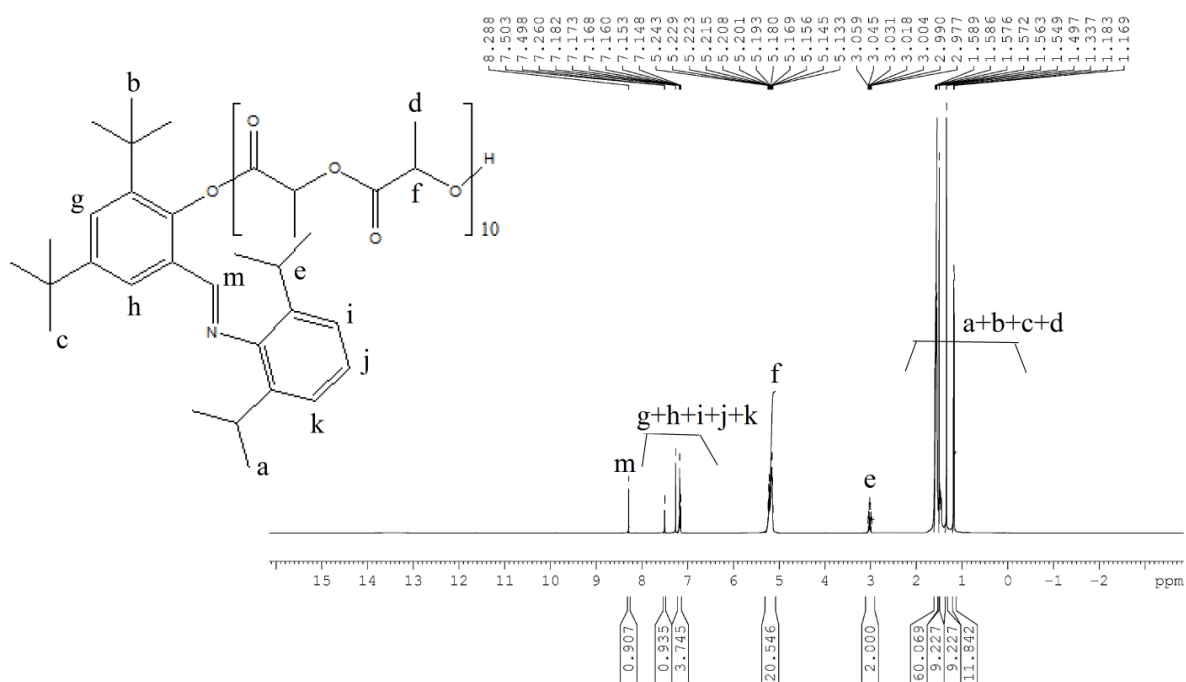

**Fig. S37.**  $^1\text{H}$  NMR spectrum of the crude product obtained from a reaction between *rac*-LA and **7** in 10:1 ratio

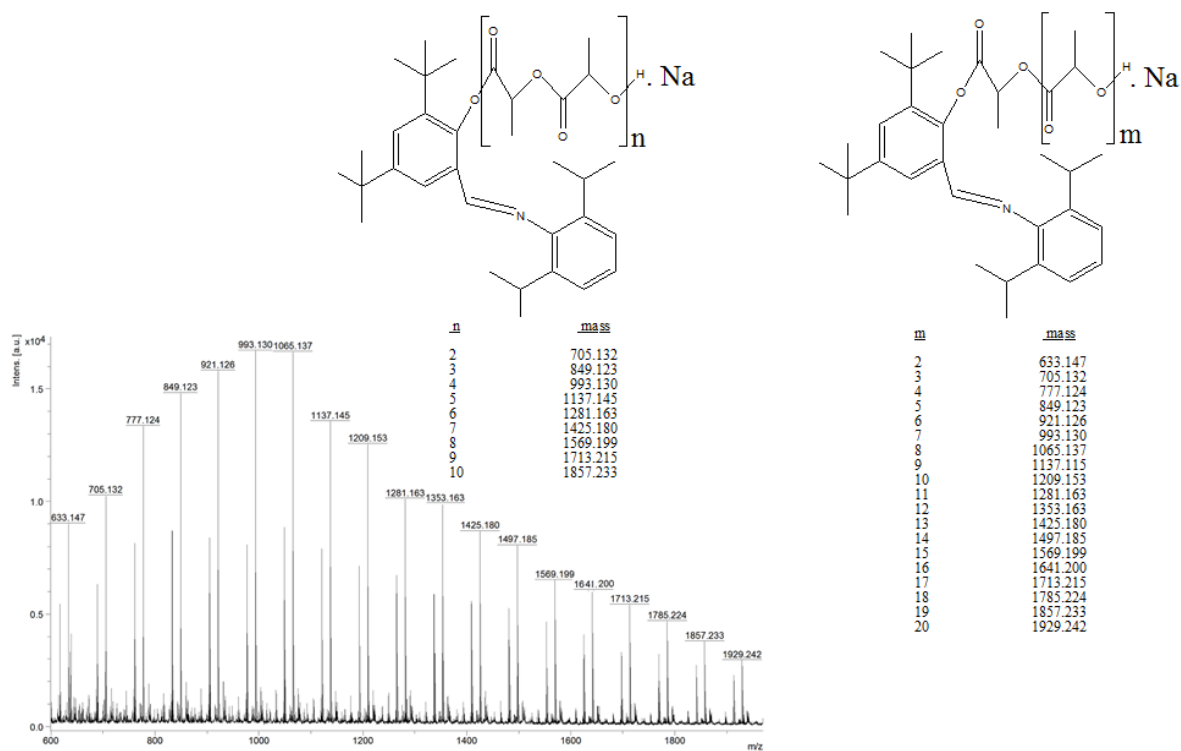

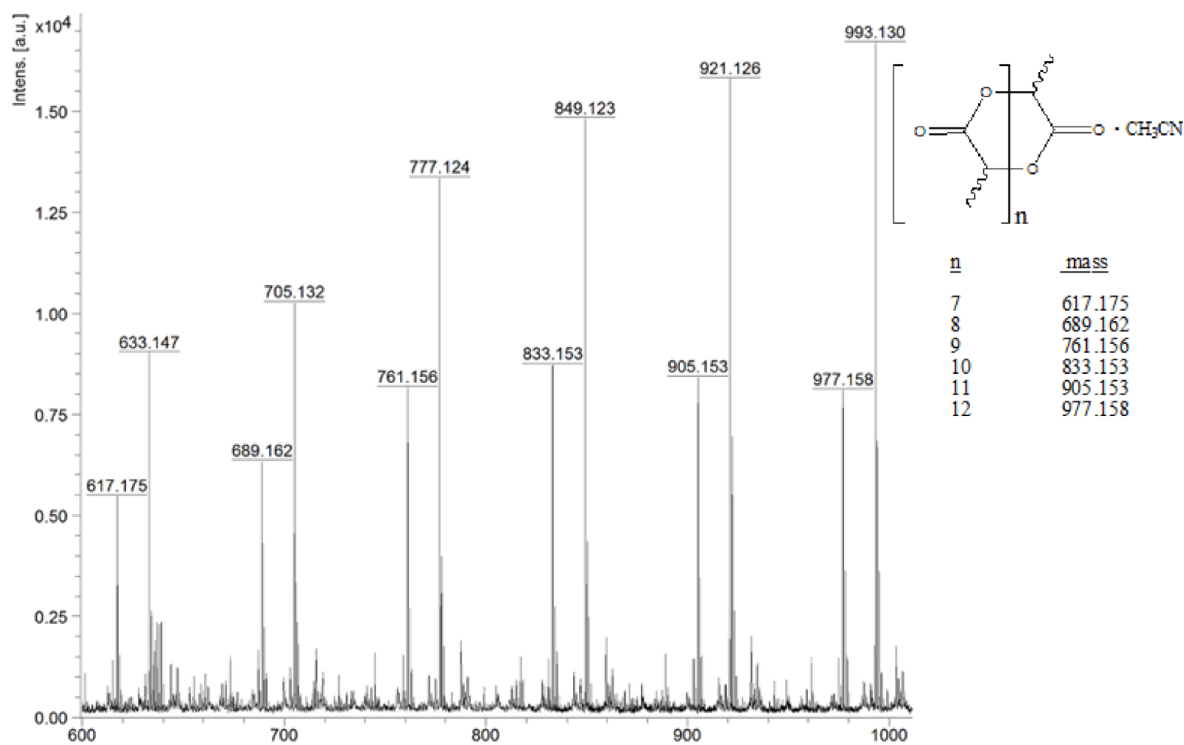

**Fig.S38.** MALDI-TOF of the crude product obtained from a reaction between *rac*-LA and **7** in 10:1 ratio

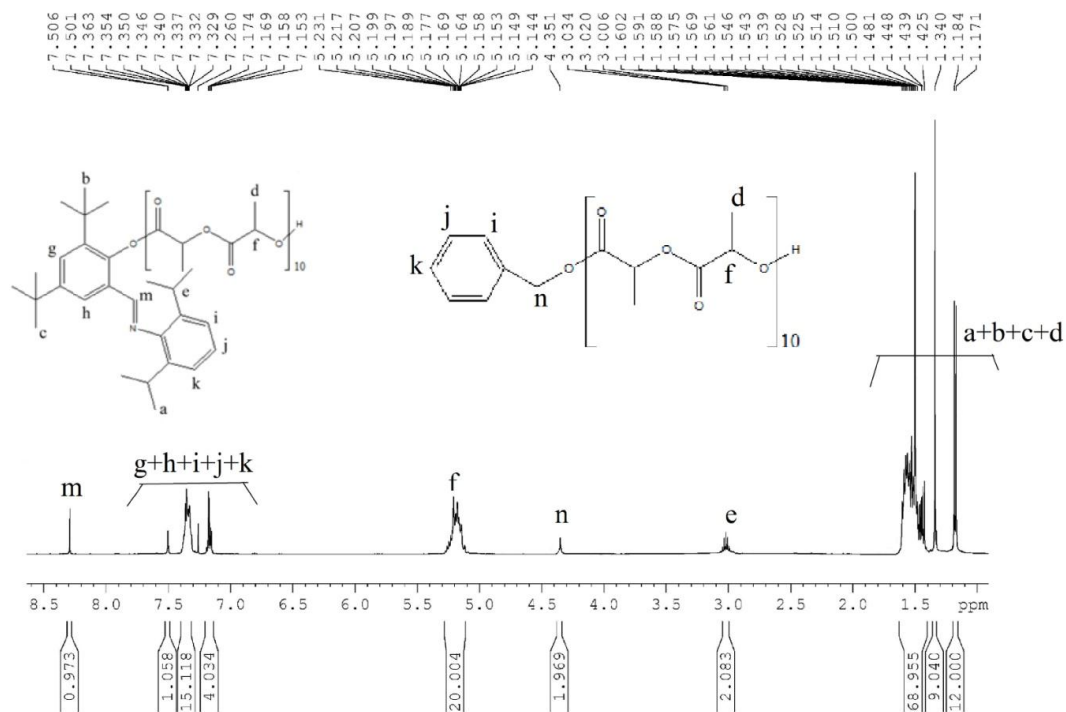

**Fig. S39.**  $^1\text{H}$  NMR spectrum of the crude product obtained from a reaction between *rac*-LA, **4** and BnOH in 10:1:2 ratio

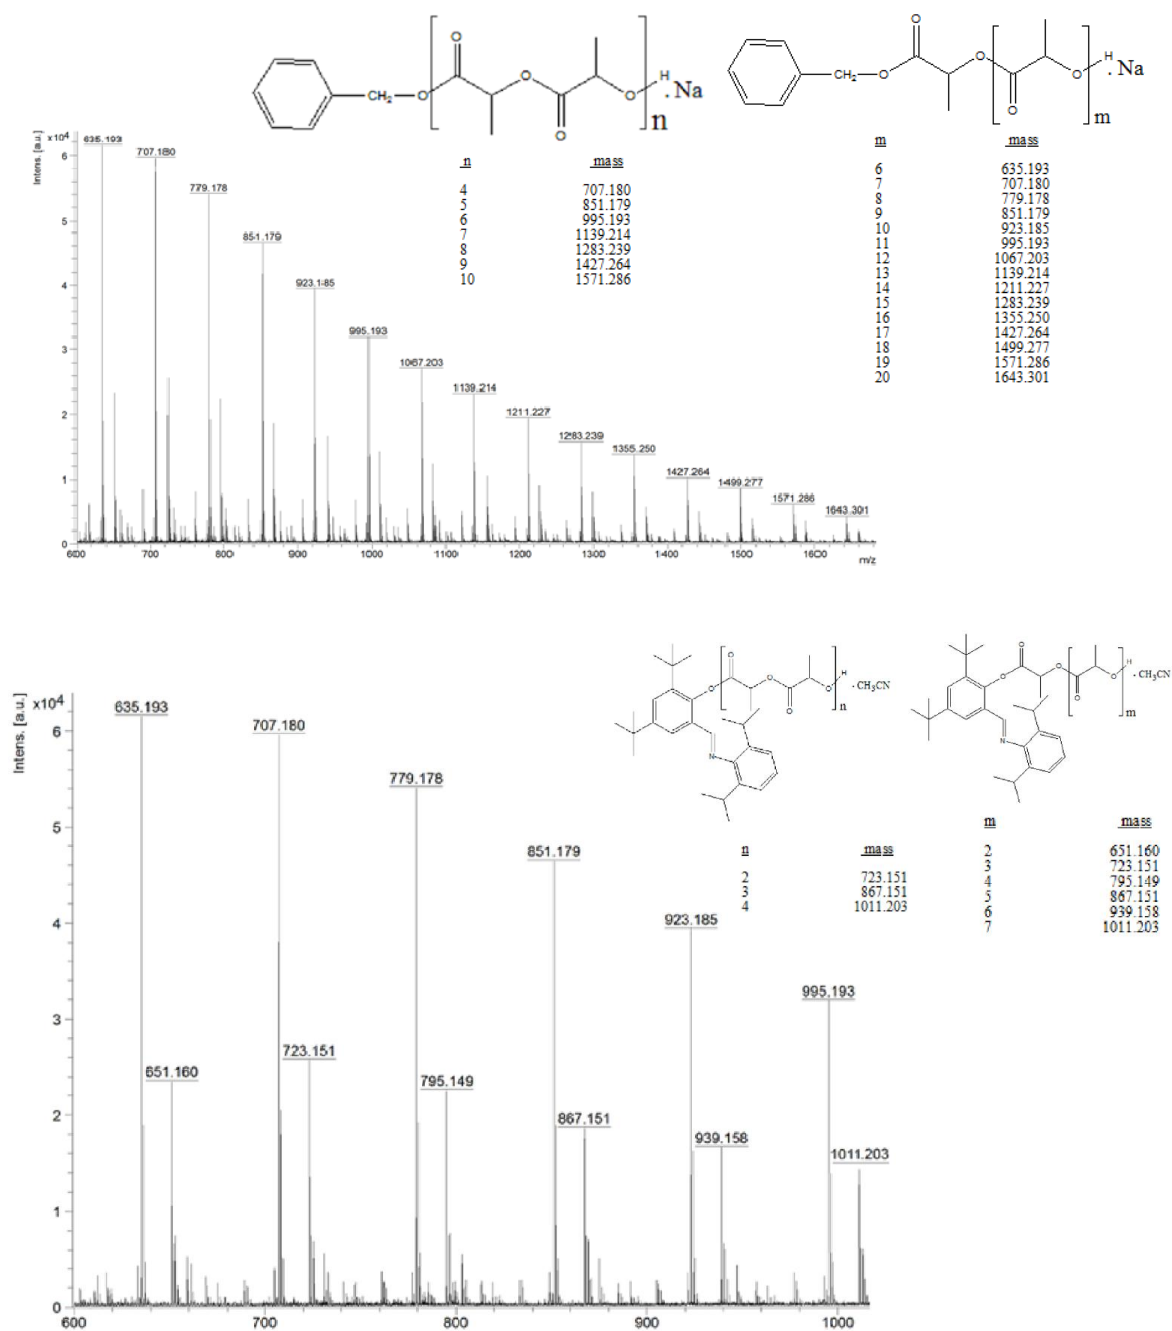

**Fig. S40.** MALDI-TOF spectrum of the crude product obtained from a reaction between *rac*-LA, **4** and BnOH in 10:1:2 ratio

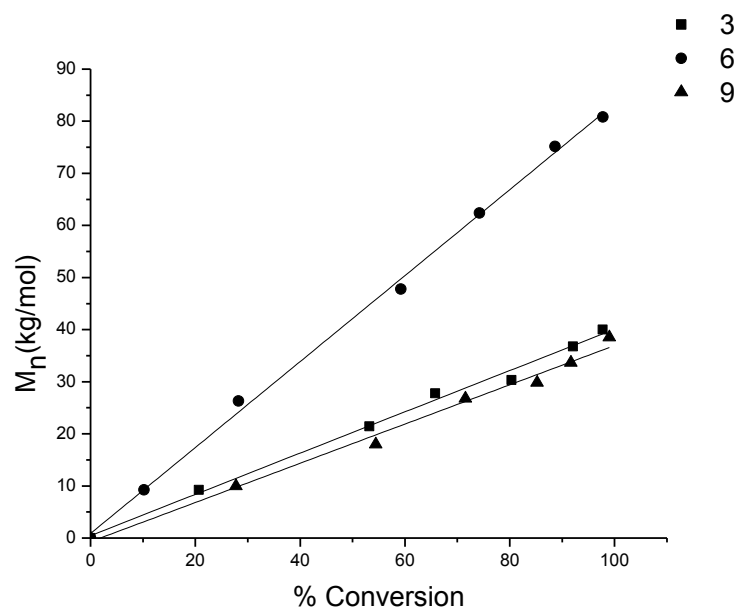

**Fig. S41.** Plot of  $M_n$  vs. % conversion of monomer

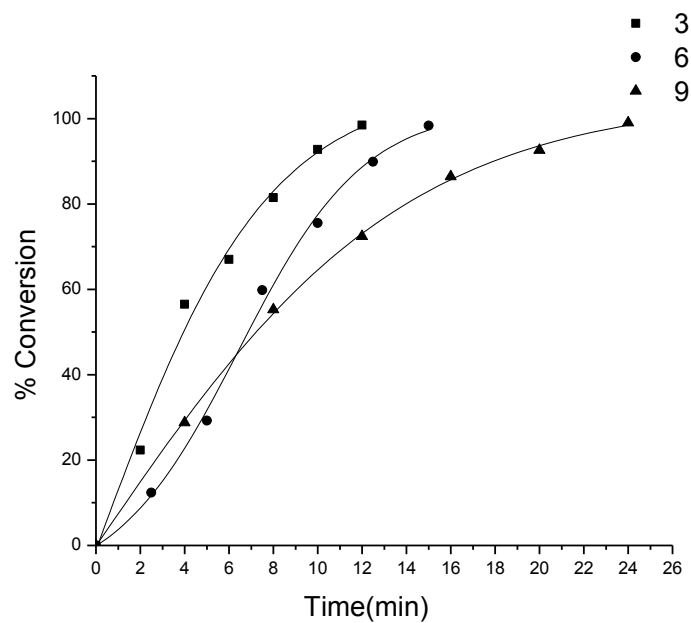

**Fig. S42.** *rac*-LA conversion vs. time plot using **3**, **6** and **9**:  $[rac\text{-LA}]_0/[Cat]_0 = 200$  at 130 °C



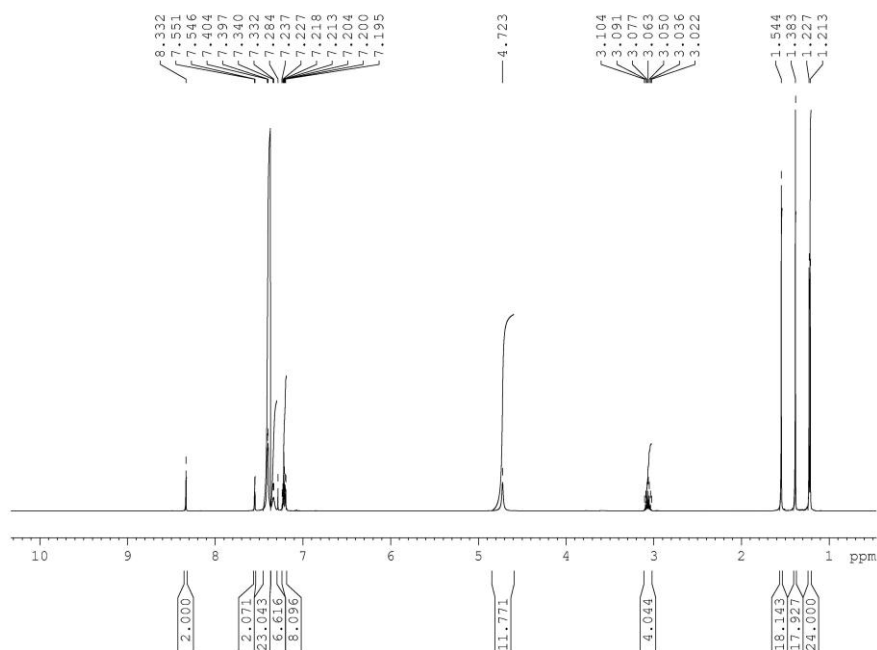

**Fig. S45.**  $^1\text{H}$  NMR spectrum of the crude product obtained from a reaction between **4** and BnOH in 1:5 ratio

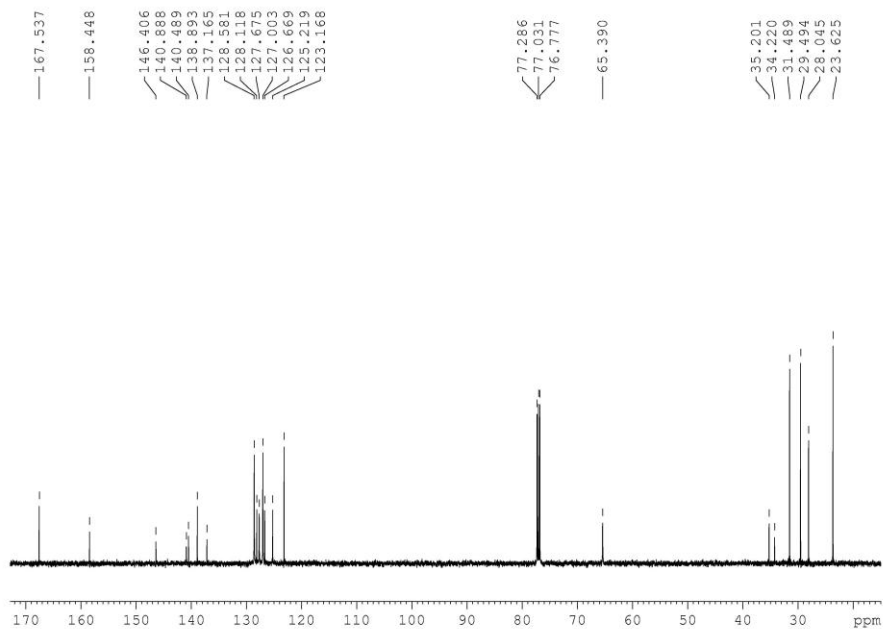

**Fig. S46.**  $^{13}\text{C}$  NMR spectrum of the crude product obtained from a reaction between **4** and BnOH in 1:5 ratio
